# Supplementary material for: Two Alleles of NF-κB in the Sea Anemone Nematostella vectensis Are Widely Dispersed in Nature and Encode Proteins with Distinct Activities
Source: PLoS One. 2009 Oct 6;4(10):e7311. doi: 10.1371/journal.pone.0007311 (PMC2751831; doi:10.1371/journal.pone.0007311)
Supplement: Figure S4 — Alignment of 159-nt region of Nv-NF-κB from 403 individual animals. Where a position in the sequence chromatogram harbored peaks for two different nucleotides, the appropriate IUPAC code is used (K = G or T; R = A or G; S = C or G; W = A or T). (0.81 MB PDF) [file pone.0007311.s004.pdf]

|             | 81 | 90 | 100 | 110 | 120 | 130 | 140 | 150 | 159 |   |   |   |   |   |   |   |   |   |   |   |   |   |   |   |   |   |   |   |   |   |   |   |   |   |   |   |   |   |   |   |   |   |   |   |   |   |   |   |   |   |   |   |   |   |   |   |   |   |   |   |   |   |   |   |   |   |   |   |   |   |   |   |   |   |   |   |   |   |   |
|-------------|----|----|-----|-----|-----|-----|-----|-----|-----|---|---|---|---|---|---|---|---|---|---|---|---|---|---|---|---|---|---|---|---|---|---|---|---|---|---|---|---|---|---|---|---|---|---|---|---|---|---|---|---|---|---|---|---|---|---|---|---|---|---|---|---|---|---|---|---|---|---|---|---|---|---|---|---|---|---|---|---|---|---|
| KNG 3 5 CC  | T  | G  | G   | G   | G   | G   | A   | C   | T   | C | C | C | T | G | G | G | C | A | G | T | T | T | T | C | G | A | C | T | T | C | T | A | A | A | A | G | C | A | A | G | T | C | A | T | A | C | C | C | G | T | C | T | G | T | C | C | A | G | G | T | A | A | T | T | C | T | A | T | T | G | T | T | T | A | C | C | T | C | A |
| KNG 3 6 CC  | T  | G  | G   | G   | G   | G   | A   | C   | T   | C | C | C | T | G | G | G | C | A | G | T | T | T | T | C | G | A | C | T | T | C | T | A | A | A | A | G | C | A | A | G | T | C | A | T | A | C | C | C | G | T | C | T | G | T | C | C | A | G | G | T | A | A | T | T | C | T | A | T | T | G | T | T | T | A | C | C | T | C | A |
| KNG 3 7 CC  | T  | G  | G   | G   | G   | G   | A   | C   | T   | C | C | C | T | G | G | G | C | A | G | T | T | T | T | C | G | A | C | T | T | C | T | A | A | A | A | G | C | A | A | G | T | C | A | T | A | C | C | C | G | T | C | T | G | T | C | C | A | G | G | T | A | A | T | T | C | T | A | T | T | G | T | T | T | A | C | C | T | C | A |
| KNG 3 8 CC  | T  | G  | G   | G   | G   | G   | A   | C   | T   | C | C | C | T | G | G | G | C | A | G | T | T | T | T | C | G | A | C | T | T | C | T | A | A | A | A | G | C | A | A | G | T | C | A | T | A | C | C | C | G | T | C | T | G | T | C | C | A | G | G | T | A | A | T | T | C | T | A | T | T | G | T | T | T | A | C | C | T | C | A |
| KNG 3 9 CC  | T  | G  | G   | G   | G   | G   | A   | C   | T   | C | C | C | T | G | G | G | C | A | G | T | T | T | T | C | G | A | C | T | T | C | T | A | A | A | A | G | C | A | A | G | T | C | A | T | A | C | C | C | G | T | C | T | G | T | C | C | A | G | G | T | A | A | T | T | C | T | A | T | T | G | T | T | T | A | C | C | T | C | A |
| KNG 3 10 CC | T  | G  | G   | G   | G   | G   | A   | C   | T   | C | C | C | T | G | G | G | C | A | G | T | T | T | T | C | G | A | C | T | T | C | T | A | A | A | A | G | C | A | A | G | T | C | A | T | A | C | C | C | G | T | C | T | G | T | C | C | A | G | G | T | A | A | T | T | C | T | A | T | T | G | T | T | T | A | C | C | T | C | A |
| KNG 3 14-CC | T  | G  | G   | G   | G   | G   | A   | C   | T   | C | C | C | T | G | G | G | C | A | G | T | T | T | T | Y | G | A | C | T | T | C | T | A | A | A | A | G | C | A | A | G | T | C | A | T | A | C | C | C | G | T | C | T | G | T | C | C | A | G | G | T | A | A | T | T | C | T | A | T | T | G | T | T | T | A | C | C | T | C | A |
| NS C1 CC    | T  | G  | G   | G   | G   | G   | A   | C   | T   | C | C | C | T | G | G | G | C | A | G | T | T | T | T | Y | G | A | C | T | T | C | T | A | A | A | A | G | C | A | A | G | T | C | A | T | A | C | C | C | G | T | C | T | G | T | C | C | A | G | G | T | A | A | T | T | C | T | A | T | T | G | T | T | T | A | C | C | T | C | A |
| NS C2 CC    | T  | G  | G   | G   | G   | G   | A   | C   | T   | C | C | C | T | G | G | G | C | A | G | T | T | T | T | C | G | A | C | T | T | C | T | A | A | A | A | G | C | A | A | G | T | C | A | T | A | C | C | C | G | T | C | T | G | T | C | C | A | G | G | T | A | A | T | T | C | T | A | T | T | G | T | T | T | A | C | C | T | C | A |
| NS C3 CC    | T  | G  | G   | G   | G   | G   | A   | C   | T   | C | C | C | T | G | G | G | C | A | G | T | T | T | T | C | G | A | C | T | T | C | T | A | A | A | A | G | C | A | A | G | T | C | A | T | A | C | C | C | G | T | C | T | G | T | C | C | A | G | G | T | A | A | T |   |   |   |   |   |   |   |   |   |   |   |   |   |   |   |   |
