# Supplementary material for: Two Alleles of NF-κB in the Sea Anemone Nematostella vectensis Are Widely Dispersed in Nature and Encode Proteins with Distinct Activities
Source: PubMed Central journal article supplement (PMC2751831; doi:10.1371/journal.pone.0007311), 2009-10-06
Supplement: pone.0007311.s001.pdf [file pone.0007311.s001.pdf]

**Supplemental Figure 1.** Partial alignment of the DNA binding region in select members of the RHD superfamily.

|                                     |                                    |                                                   |     |
|-------------------------------------|------------------------------------|---------------------------------------------------|-----|
| <b>NFκB</b> ( <i>Nematostella</i> ) | [ <a href="#">ABU48530</a> ]       | <b>50</b> LEILEQPKPRGFRFRYP <b>SE</b> G <b>69</b> |     |
|                                     |                                    | <b>50</b> LEILEQPKPRGFRFRYP <b>CE</b> G <b>69</b> |     |
| <b>NFκB</b>                         |                                    |                                                   |     |
| NFκB ( <i>Amphimedon</i> )          | [ <a href="#">ABW76682.1</a> ]     | 48 LEIVEQPKSRGFRFRYD <b>CE</b> G                  | 67  |
| NFκB ( <i>Ciona</i> )               | [ <a href="#">NP_001071772.1</a> ] | 26 LEIIEENPKSRGFRFRY <b>TCE</b> G                 | 45  |
| NFκB ( <i>Strongylocentrotus</i> )  | [ <a href="#">NP_999819.1</a> ]    | 62 LKILEQPRQ <b>R</b> GFRFRY <b>GCE</b> G         | 81  |
| NFκB ( <i>Pinctada</i> )            | [ <a href="#">ABL63469.1</a> ]     | 102 TEIMEQPKQ <b>R</b> GLRFRY <b>ECE</b> G        | 121 |
| NFκB ( <i>Euprymna</i> )            | [ <a href="#">AAZ27981.1</a> ]     | 48 VVITEQPKSRGFRFRY <b>QCE</b> G                  | 65  |
| <br>                                |                                    |                                                   |     |
| NFκB1 ( <i>Homo</i> )               | [ <a href="#">NM_003998.2</a> ]    | 45 LQILEQPKQ <b>R</b> GFRFRY <b>VCE</b> G         | 64  |
| NFκB1 ( <i>Macaca</i> )             | [ <a href="#">XP_001109277.1</a> ] | 45 LQILEQPKQ <b>R</b> GFRFRY <b>VCE</b> G         | 64  |
| NFκB1 ( <i>Mus</i> )                | [ <a href="#">EDL12142.1</a> ]     | 42 LQILEQPKQ <b>R</b> GFRFRY <b>VCE</b> G         | 61  |
| NFκB1 ( <i>Rattus</i> )             | [ <a href="#">EDL82271.1</a> ]     | 42 LQILEQPKQ <b>R</b> GFRFRY <b>VCE</b> G         | 61  |
| NFκB1 ( <i>Equus</i> )              | [ <a href="#">XM_001915438.1</a> ] | 43 LQILEQPKQ <b>R</b> GFRFRY <b>VCE</b> G         | 62  |
| NFκB1 ( <i>Bos</i> )                | [ <a href="#">AAI53233</a> ]       | 44 LQILEQPKQ <b>R</b> GFRFRY <b>VCE</b> G         | 63  |
| NFκB1 ( <i>Sus</i> )                | [ <a href="#">ABU63584.1</a> ]     | 44 LQILEQPKQ <b>R</b> GFRFRY <b>VCE</b> G         | 63  |
| NFκB1 ( <i>Canis</i> )              | [ <a href="#">NP_001003344.1</a> ] | 44 LQILEQPKQ <b>R</b> GFRFRY <b>VCE</b> G         | 63  |
| NFκB1 ( <i>Monodelphis</i> )        | [ <a href="#">XP_001368747.1</a> ] | 28 LQILEQPKQ <b>R</b> GFRFRY <b>VCE</b> G         | 47  |
| NFκB1 ( <i>Gallus</i> )             | [ <a href="#">AAB58343.1</a> ]     | 70 LQIIEQPKQ <b>R</b> GFRFRY <b>VCE</b> G         | 89  |
| NFκB1 ( <i>Danio</i> )              | [ <a href="#">AAZ67903.1</a> ]     | 49 LQITEQPKQ <b>R</b> GFRFRY <b>GCE</b> G         | 68  |
| <br>                                |                                    |                                                   |     |
| NFκB2 ( <i>Homo</i> )               | [ <a href="#">EAW49703.1</a> ]     | 40 LVIVEQPKQ <b>R</b> GFRFRY <b>GCE</b> G         | 59  |
| NFκB2 ( <i>Macaca</i> )             | [ <a href="#">XP_001104566.1</a> ] | 40 LVIVEQPKQ <b>R</b> GFRFRY <b>GCE</b> G         | 59  |
| NFκB2 ( <i>Mus</i> )                | [ <a href="#">AAZ44753.1</a> ]     | 40 LVIVEQPKQ <b>R</b> GFRFRY <b>GCE</b> G         | 59  |
| NFκB2 ( <i>Rattus</i> )             | [ <a href="#">NP_001008350.1</a> ] | 40 LVIVEQPKQ <b>R</b> GFRFRY <b>GCE</b> G         | 59  |
| NFκB2 ( <i>Equus</i> )              | [ <a href="#">XP_001916453.1</a> ] | 40 LVIVEQPKQ <b>R</b> GFRFRY <b>GCE</b> G         | 59  |
| NFκB2 ( <i>Bos</i> )                | [ <a href="#">NP_001095571.1</a> ] | 40 LVIVEQPKQ <b>R</b> GFRFRY <b>GCE</b> G         | 59  |
| NFκB2 ( <i>Sus</i> )                | [ <a href="#">XP_001925739.1</a> ] | 40 LVIVEQPKQ <b>R</b> GFRFRY <b>GCE</b> G         | 59  |
| NFκB2 ( <i>Canis</i> )              | [ <a href="#">XP_543988.2</a> ]    | 40 LVIVEQPKQ <b>R</b> GFRFRY <b>GCE</b> G         | 59  |
| NFκB2 ( <i>Monodelphis</i> )        | [ <a href="#">XP_001379024.1</a> ] | 44 LVIVEQPKQ <b>R</b> GFRFRY <b>GCE</b> G         | 63  |
| NFκB2 ( <i>Gallus</i> )             | [ <a href="#">P98150.1</a> ]       | 39 LVIIEQPKQ <b>R</b> GFRFRY <b>VCE</b> G         | 58  |
| NFκB2 ( <i>Xenopus</i> )            | [ <a href="#">AAH76882.1</a> ]     | 45 LSIIEQPKQ <b>R</b> GFRFRY <b>VCE</b> G         | 64  |
| NFκB2 ( <i>Danio</i> )              | [ <a href="#">NP_001001840.2</a> ] | 55 IQIIEEPKQ <b>R</b> GFRFRY <b>ECE</b> G         | 74  |
| <br>                                |                                    |                                                   |     |
| <b>REL</b>                          |                                    |                                                   |     |
| Rel2 ( <i>Crassostrea</i> )         | [ <a href="#">AAK72691.1</a> ]     | 85 VEIVEQPKQ <b>R</b> GLRFRY <b>ECE</b> G         | 104 |
| RelA ( <i>Ciona</i> )               | [ <a href="#">AAV80379.1</a> ]     | 7 LEIVEQPKQ <b>R</b> GMRFRY <b>ECE</b> G          | 26  |
| Rel ( <i>Halocynthia</i> )          | [ <a href="#">BAB47173.1</a> ]     | 15 LVITEQPKQ <b>R</b> GMRFRY <b>ECE</b> G         | 34  |
| <br>                                |                                    |                                                   |     |
| Rel ( <i>Homo</i> )                 | [ <a href="#">CAA52954.1</a> ]     | 10 IEIIEQPRQ <b>R</b> GMRFRY <b>KCE</b> G         | 29  |
| Rel ( <i>Pan</i> )                  | [ <a href="#">ABM54265.1</a> ]     | 8 IEIIEQPRQ <b>R</b> GMRFRY <b>KCE</b> G          | 27  |
| Rel ( <i>Mus</i> )                  | [ <a href="#">CAA33843.1</a> ]     | 10 VEIIEQPRQ <b>R</b> GMRFRY <b>KCE</b> G         | 29  |
| Rel ( <i>Gallus</i> )               | [ <a href="#">XP_419277.2</a> ]    | 9 IEIFEQPRQ <b>R</b> GMRFRY <b>KCE</b> G          | 28  |
| Rel ( <i>Danio</i> )                | [ <a href="#">AAO26402.1</a> ]     | 20 VQIFEQPKQ <b>R</b> GMRFRY <b>KCE</b> G         | 39  |
| <br>                                |                                    |                                                   |     |
| RelA ( <i>Homo</i> )                | [ <a href="#">BAG64344.1</a> ]     | 21 VEIIEQPKQ <b>R</b> GMRFRY <b>KCE</b> G         | 40  |
| RelA ( <i>Pan</i> )                 | [ <a href="#">ABM91918.1</a> ]     | 21 VEIIEQPKQ <b>R</b> GMRFRY <b>KCE</b> G         | 40  |
| RelA ( <i>Mus</i> )                 | [ <a href="#">AAZ44745.1</a> ]     | 21 VEIIEQPKQ <b>R</b> GMRFRY <b>KCE</b> G         | 40  |
| RelA ( <i>Equus</i> )               | [ <a href="#">XP_001490867.2</a> ] | 21 VEIIEQPKQ <b>R</b> GMRFRY <b>KCE</b> G         | 40  |
| Rel? ( <i>Monodelphis</i> )         | [ <a href="#">XP_001379658.1</a> ] | 15 VEIIEQPKQ <b>R</b> GMRFRY <b>KCE</b> G         | 34  |
| RelA-a ( <i>Xenopus</i> )           | [ <a href="#">AAH70711.1</a> ]     | 19 VEIIEQPKQ <b>R</b> GMRFRY <b>KCE</b> G         | 38  |
| RelA ( <i>Danio</i> )               | [ <a href="#">AAI62910.1</a> ]     | 20 VEIIEQPKSRGMRFRY <b>KCE</b> G                  | 39  |

## Supplemental Figure 1. (continued)

|                                    |                                    |            |                                    |            |
|------------------------------------|------------------------------------|------------|------------------------------------|------------|
| RelB ( <i>Homo</i> )               | [ <a href="#">BAF83283.1</a> ]     | 127        | LVITEQPKQKQGMRFRYE <b>CEG</b>      | 146        |
| RelB ( <i>Pan</i> )                | [ <a href="#">XP 512742.2</a> ]    | 127        | LVITEQPKQKQGMRFRYE <b>CEG</b>      | 146        |
| RelB ( <i>Mus</i> )                | [ <a href="#">EDL23169.1</a> ]     | 143        | LVITEQPKQKQGMRFRYE <b>CEG</b>      | 162        |
| RelB ( <i>Equus</i> )              | [ <a href="#">XP 001917013.1</a> ] | 145        | LVISEQPKQKQGMRFRYE <b>CEG</b>      | 164        |
| RelB-a ( <i>Xenopus</i> )          | [ <a href="#">NP 001079335.1</a> ] | 80         | LNITEQPKQKQGMRFRYQ <b>CEG</b>      | 99         |
| RelB ( <i>Danio</i> )              |                                    |            |                                    |            |
| <b>DIF /DORSAL</b>                 |                                    |            |                                    |            |
| Dif ( <i>Drosophila</i> )          | [ <a href="#">AAM48404.1</a> ]     | 80         | LRIVEEPTSNIIRFRYK <b>CEG</b>       | 99         |
| Dorsal ( <i>Drosophila</i> )       | [ <a href="#">AAT94434.1</a> ]     | 49         | VKITEQPAGKALRFRYE <b>CEG</b>       | 68         |
| Dorsal ( <i>Tribolium</i> )        | [ <a href="#">AAG22858.1</a> ]     | 65         | VKIIEQPASKALRFRYE <b>CEG</b>       | 83         |
| Gambif1 ( <i>Anopheles</i> )       | [ <a href="#">XP 310177.3</a> ]    | 50         | VEITEQPHPKALRFRYE <b>CEG</b>       | 69         |
| <b>RELISH</b>                      |                                    |            |                                    |            |
| Relish ( <i>Drosophila</i> )       | [ <a href="#">AAF20134.1</a> ]     | 87         | LRIVEQPVEK-FRFRYK <b>SEM</b>       | 105        |
| Relish ( <i>Tribolium</i> )        | [ <a href="#">XP 970894.1</a> ]    | 1          | LRIIEQPIDR-FRFRYK <b>SEM</b>       | 79         |
| Relish ( <i>Aedes</i> )            | [ <a href="#">XP 001658517.1</a> ] | 135        | LTIVEQPVDK-FRFRYQ <b>SEM</b>       | 153        |
| <b>NFAT</b>                        |                                    |            |                                    |            |
| <b>NFAT (<i>Nematostella</i>)</b>  | [ <a href="#">XP 001632550.1</a> ] | <b>519</b> | <b>LVLLEEPEEN-YRARYE<b>SEG</b></b> | <b>537</b> |
| NFAT ( <i>Drosophila</i> )         | [ <a href="#">NP 001096974.1</a> ] | 504        | LEILSQPEQQ-HRARYQ <b>TEG</b>       | 522        |
| NFAT ( <i>Ciona</i> )              | [ <a href="#">XP 002120942.1</a> ] | 348        | LSIVNQPEPQ-HRARYL <b>TEG</b>       | 366        |
| NFAT ( <i>Strongylocentrotus</i> ) | [ <a href="#">XP 001177692.1</a> ] | 230        | IHITVQPEKH-HRARYR <b>TEG</b>       | 248        |
| NFAT1 ( <i>Homo</i> )              | [ <a href="#">ACG55586.1</a> ]     | 415        | LRIEVQPKSH-HRAHYE <b>TEG</b>       | 433        |
| NFAT1 ( <i>Xenopus</i> )           | [ <a href="#">NP 001072740.1</a> ] | 417        | LRIEVQPKSH-HRAHYE <b>TEG</b>       | 435        |
| NFAT1 ( <i>Danio</i> )             | [ <a href="#">NP 001038624.1</a> ] | 369        | LQIDVQPKSH-HRAHYE <b>TEG</b>       | 387        |
| NFAT1 ( <i>Gallus</i> )            | [ <a href="#">XP 418906.2</a> ]    | 413        | LRIEVQPKSH-HRAHYE <b>TEG</b>       | 431        |
| NFAT2 ( <i>Homo</i> )              | [ <a href="#">ACG55599.1</a> ]     | 191        | LRIEVQPKPH-HRAHYE <b>TEG</b>       | 209        |
| NFAT2 ( <i>Gallus</i> )            | [ <a href="#">XP 417509.2</a> ]    | 410        | LRIEVQPKPH-HRAHYE <b>TEG</b>       | 428        |
| NFAT2 ( <i>Danio</i> )             | [ <a href="#">XP 700591.3</a> ]    | 337        | LRIEAQPRQH-HRAHYE <b>TEG</b>       | 355        |
| NFAT3 ( <i>Homo</i> )              | [ <a href="#">BAF83059.1</a> ]     | 438        | LKIEVQPKTH-HRAHYE <b>TEG</b>       | 451        |
| NFAT3 ( <i>Gallus</i> )            | [ <a href="#">XP 414078.2</a> ]    | 555        | LKIEVQPKTH-HRAHYE <b>TEG</b>       | 573        |
| NFAT3 ( <i>Danio</i> )             | [ <a href="#">XP 690273.3</a> ]    | 443        | LKIEVQPKAH-HRAHYE <b>TEG</b>       | 461        |
| NFAT4 ( <i>Homo</i> )              | [ <a href="#">ACG55669.1</a> ]     | 349        | LRIEVQPRAH-HRAHYE <b>TEG</b>       | 367        |
| NFAT4 ( <i>Danio</i> )             | [ <a href="#">XP 690183.2</a> ]    | 270        | LRIEVQPRPH-HRAHYE <b>TEG</b>       | 288        |
| NFAT5 ( <i>Homo</i> )              | [ <a href="#">NP 619727.2</a> ]    | 300        | LKIVVQPETQ-HRARYL <b>TEG</b>       | 318        |
| NFAT5 ( <i>Monodelphis</i> )       | [ <a href="#">XP 001378219.1</a> ] | 510        | LKIVVQPETQ-HRARYL <b>TEG</b>       | 528        |
| NFAT5 ( <i>Gallus</i> )            | [ <a href="#">BAG70407.2</a> ]     | 206        | LKIVVQPETQ-HRARYL <b>TEG</b>       | 224        |
| NFAT5 ( <i>Danio</i> )             | [ <a href="#">NP 956189.1</a> ]    | 268        | LKILVQPETQ-HRARYL <b>TEG</b>       | 286        |
