# Supplementary material for: Two Alleles of NF-κB in the Sea Anemone Nematostella vectensis Are Widely Dispersed in Nature and Encode Proteins with Distinct Activities
Source: PubMed Central journal article supplement (PMC2751831; doi:10.1371/journal.pone.0007311), 2009-10-06
Supplement: pone.0007311.s002.pdf [file pone.0007311.s002.pdf]

Supplemental Figure 2. Alignment of NF-κB alleles.

|            |                                                               |                         |     |     |     |        |
|------------|---------------------------------------------------------------|-------------------------|-----|-----|-----|--------|
|            | 10                                                            | 20                      | 30  | 40  | 50  | 60     |
| NvNFkB_C67 | ATGGCACAGTCTGAACAGCAAGTGGGTAGTGCTCTCACAGAAAGCATGTTAAATGAGATC  |                         |     |     |     |        |
| NvNFkB_S67 | ATGGCACAGTCTGAACAGCAAGTGGGTAGTGCTCTCACAGAAAGCATGTTAAATGAGATC  |                         |     |     |     |        |
|            | M A Q S E Q Q V G S A L T E S M L N E I                       |                         |     |     |     |        |
|            | 70                                                            | 80                      | 90  | 100 | 110 | 120    |
| NvNFkB_C67 | ATTCAACCTGGTTATCTACCAAGATATCAGTGCTCTGCATGTCCCATTAGGCACAAATGCA |                         |     |     |     |        |
| NvNFkB_S67 | ATTCCACCTGGTTATCTACCTTGATATCAGTGCTCTGCATGTCCCATTAGGCACAAATGCA |                         |     |     |     |        |
|            | I Q/R P G Y L P D I S A L H V P L G T N A                     |                         |     |     |     |        |
|            |                                                               |                         |     |     |     | 1      |
|            | 130                                                           | 140                     | 150 | 160 | 170 | 180    |
| NvNFkB_C67 | GAGGAGCCTTCTTACACCGAGCCCTACCTAGAAATTCTTGAACAGCCTAAACCGGCATGG  |                         |     |     |     |        |
| NvNFkB_S67 | GAGGAGCCTTCTTACACCGAGCCCTACCTAGAAATTCTTGAACAGCCTAAACCGGCATGG  |                         |     |     |     |        |
|            | E E P S Y T E P Y L E I L E Q P K P [.....                    |                         |     |     |     |        |
| Allele C1  |                                                               |                         |     |     |     | GCATGG |
| Allele C2  |                                                               |                         |     |     |     | GCATGG |
| Allele C3  |                                                               |                         |     |     |     | ACATGG |
| Allele C4  |                                                               |                         |     |     |     | ACATGG |
| Allele S1  |                                                               |                         |     |     |     | GCATGG |
|            | 2                                                             |                         | 3   | 4   |     | 5      |
|            | 190                                                           | 200                     | 210 | 220 | 230 | 240    |
| NvNFkB_C67 | AAAGAATGATTAATTGAATTAATTGTAGCGTGGTTTCCGGTTCCGATACCCATGCGAAGG  |                         |     |     |     |        |
| NvNFkB_S67 | AAATAATGATTAATTGAATTAATTTTAGCGTGGTTTCCGATTCCGATACCCAAGTGAAGG  |                         |     |     |     |        |
|            | .....intronic.....]                                           | R G F R F R Y P C/S E G |     |     |     |        |
| Allele C1  | AAAGAATGATTAATTGAATTAATTGTAGCGTGGTTTCCGGTTCCGATACCCATGTTGAAGG |                         |     |     |     |        |
| Allele C2  | AAAGAATGATTAATTGAATTAATTGTAGCGTGGTTTCCGGTTCCGATACCCATGTTGAAGG |                         |     |     |     |        |
| Allele C3  | AAAGAATGATTAATTGAATTAATTGTAGCGTGGTTTCCGGTTCCGATACCCATGTTGAAGG |                         |     |     |     |        |
| Allele C4  | AAAGAATGATTAATTGAATTAATTGTAGCGTGGTTTCCGGTTCCGATACCCATGTTGAAGG |                         |     |     |     |        |
| Allele S1  | AAATAATGATTAATTGAATTAATTTTAGCGTGGTTTCCGATTCCGATACCCAAGTGAAGG  |                         |     |     |     |        |
|            | 250                                                           | 260                     | 270 | 280 | 290 | 300    |
| NvNFkB_C67 | GCCTTCCCATGGGGGACTCCCTGGGCAGTTTTTCGACTTCTAAAAGCAAGTCATACCCGTC |                         |     |     |     |        |
| NvNFkB_S67 | GCCTTCCCATGGGGGACTCCCTGGGCAGTTTTTCGACTTCTAAAAGCAAGTCATACCCGTC |                         |     |     |     |        |
|            | P S H G G L P G Q F S T S K S K S Y P S                       |                         |     |     |     |        |
| Allele C1  | GCCTTCCCATGGGGGACTCCCTGGGCAGTTTTTCGACTTCTAAAAGCAAGTCATACCCGTC |                         |     |     |     |        |
| Allele C2  | GCCTTCCCATGGGGGACTCCCTGGGCAGTTTTTCGACTTCTAAAAGCAAGTCATACCCGTC |                         |     |     |     |        |
| Allele C3  | GCCTTCCCATGGGGGACTCCCTGGGCAGTTTTTCGACTTCTAAAAGCAAGTCATACCCGTC |                         |     |     |     |        |
| Allele C4  | GCCTTCCCATGGGGGACTCCCTGGGCAGTTTTTCGACTTCTAAAAGCAAGTCATACCCGTC |                         |     |     |     |        |
| Allele S1  | GCCTTCCCATGGGGGACTCCCTGGGCAGTTTTTCGACTTCTAAAAGCAAGTCATACCCGTC |                         |     |     |     |        |
|            |                                                               |                         | 7   |     |     |        |
|            | 310                                                           | 320                     | 330 | 340 | 350 | 360    |
| NvNFkB_C67 | TGTCCAGGTAATTCTATTGTTTACCTCGTGAACAACCTACCAAGGACCATGTAGAATAGTT |                         |     |     |     |        |
| NvNFkB_S67 | TGTCCAGGTAATTCTATTGTTTACCTGGTGAACAACCTACCAAGGACCATGTAGAATAGTT |                         |     |     |     |        |
|            | V Q [.....intronic.....]                                      | V N N Y Q G P C R I V   |     |     |     |        |
| Allele C1  | TGTCCAGGTAATTCTATTGTTTACCTC                                   |                         |     |     |     |        |
| Allele C2  | TGTCCAGGTAATTCTATTGTTTACCTG                                   |                         |     |     |     |        |
| Allele C3  | TGTCCAGGTAATTCTATTGTTTACCTG                                   |                         |     |     |     |        |
| Allele C4  | TGTCCAGGTAATTCTATTGTTTACCTC                                   |                         |     |     |     |        |
| Allele S1  | TGTCCAGGTAATTCTATTGTTTACCTG                                   |                         |     |     |     |        |
|            | 370                                                           | 380                     | 390 | 400 | 410 | 420    |
| NvNFkB_C67 | GTAACCTTGGTTACAAAAGATGAACCTTATATGCTACATGCACATAGTTTAACTGGGAAG  |                         |     |     |     |        |
| NvNFkB_S67 | GTAACCTTGGTCACAAAAGATGAACCTTATATGCTACATGCACATAGTTTAACTGGGAAG  |                         |     |     |     |        |
|            | V T L V T K D E P Y M L H A H S L T G K                       |                         |     |     |     |        |
|            | 430                                                           | 440                     | 450 | 460 | 470 | 480    |
| NvNFkB_C67 | AATGCTAATGAAGAAGGAGTAGTCACCGTCAAGTGGGGCCGGATCAACACATGACAGCG   |                         |     |     |     |        |
| NvNFkB_S67 | AATGCTAATGAAGAAGGAGTAGTCACCGTCAAGTGGGGCCGGATCAACACATGACAGCG   |                         |     |     |     |        |
|            | N A N E E G V V T V Q V G P D Q H M T A                       |                         |     |     |     |        |
|            | 490                                                           | 500                     | 510 | 520 | 530 | 540    |
| NvNFkB_C67 | AGCTTCCCAAACCTTGGGAATCCAGCATGTCACTAAAAAGAATGTTGTTAAAGTACTAATG |                         |     |     |     |        |

**NvNFkB\_S67** AGCTTCCCAAACCTTGGGAATCCAGCATGTCACTAAAAAGAATGTTGTTAAAGTACTAATG  
S F P N L G I Q H V T K K N V V K V L M  
550 560 570 580 590 600  
**NvNFkB\_C67** GATAGATTTATAAAGTGGCAAACCTCTGCAAATGCAACTTTTCGCCAAATTGTCAGAAGGT  
**NvNFkB\_S67** GATAGATTTATAAAGTGGCAAACCTCTGCAAATGCAACTTTTCGCCAAATTGTCAGAAGGT  
D R F I K W Q T L Q N A T F A K L S E G  
610 620 630 640 650 660  
**NvNFkB\_C67** ATCAAGGATGGTGTAGACCTATCACTCTTTGGTGTCAATACAGCCATAAACTCAAACAAG  
**NvNFkB\_S67** ATCAAGGATGGTGTAGACCTATCACTCTTTGGTGTCAATACAGCCATAAACTCAAACAAG  
I K D G V D L S L F G V N T A I N S N K  
670 680 690 700 710 720  
**NvNFkB\_C67** CTTGGGTTTTGACAAAACTGTGGCGCTCTCTGTGCGCAAACGAAGAAGTTGCCAAAAGTAGA  
**NvNFkB\_S67** CTTGGGTTTTGACAAAACTGTGGCGCTCTCTGTGCGCAAACGAAGAAGTTGCCAAAAGTAGA  
L G F D K S/N V A L S V A N E/Q E V/A A K S R  
730 740 750 760 770 780  
**NvNFkB\_C67** GAGTACGCTGAGCAACAGGCCGCTGCCATGGATCTAAGTGCTGTGAGACTCTGCTTCCAG  
**NvNFkB\_S67** GAGTACGCTAAGCAACAGGCCGCTGCCATGGATCTAAGTGCTGTGAGACTCTGCTTCCAG  
E Y A E/K Q Q A A A M D L S A V R L C F Q  
790 800 810 820 830 840  
**NvNFkB\_C67** GCATACCTACCAGACCAAGACGGCAACTTTACCAGACCTCTGAAGCCAGTGTACTCAGAT  
**NvNFkB\_S67** GCATACCTACCAGACCAAGATGGCAACTTTACCAGACCTCTGAAGCCAGTGTACTCAGAT  
A Y L P D Q D G N F T R P L K P V Y S D  
850 860 870 880 890 900  
**NvNFkB\_C67** GCTGTCTTGGACTCAAAAGCACCATCAGCATCTCAATTGAAAATCTGTGCGCATGGACAAG  
**NvNFkB\_S67** GCTGTCTTGGACTCAAAAGCACCATCAGCATCTCAATTGAAAATCTGTGCGCATGGACAAG  
A V L D S K A/E P S A S Q L K I C R M D K  
910 920 930 940 950 960  
**NvNFkB\_C67** AACTCAGGATGTGTAACCTGGTGGTGTGAAATATACCTGCTTTGTGACAAAGTTCAGAAA  
**NvNFkB\_S67** AACTCAGGATGTGTAACCTGGTGGTGTGAAATATACCTGCTTTGTGACAAAGTTCAGAAA  
N S G C V T G G D E I Y L L C D K V Q K  
970 980 990 1000 1010 1020  
**NvNFkB\_C67** GATGACATTGAGATACTTTTTATGAAATGGATGATATCACTGGCAAGTACACATGGGAA  
**NvNFkB\_S67** GATGACATTGAGATACTTTTTATGAAATGGATGATATCACTGGCAAGTACACATGGGAA  
D D I E I H F Y E M D D I T G K Y T W E  
1030 1040 1050 1060 1070 1080  
**NvNFkB\_C67** GATTTAGGGAAGTTCTCTCCATGCGATGTGCACCGACAGTTTGCATAGTGTTCAAAAC  
**NvNFkB\_S67** GATTTAGGGAAGTTCTCTCCATGCGATGTGCACCGACAGTTTGCATAGTGTTCAAAAC  
D L G K F S P C D V H R Q F A I V F K T  
1090 1100 1110 1120 1130 1140  
**NvNFkB\_C67** CCGCCTTATTGGAACATTGCTATCGAGAGACCAGCAAATGTCCTTGTAGAGCTTCGACGT  
**NvNFkB\_S67** CCGCCTTATTGGAACATTGCTATCGAGAGACCAGCAAATGTCCTTGTAGAGCTTCGACGT  
P P Y W N I A I E R P A N V L V E L R R  
1150 1160 1170 1180 1190 1200  
**NvNFkB\_C67** AAGAAGAATGGTGGGGAACAAGTGAACCTGTGCAATTCACCTACCAGCCACAACCTTTTT  
**NvNFkB\_S67** AAGAAGAATGGTGGGGAACAAGTGAACCTGTGCAATTCACCTACCAGCCACAACCTTTTT  
K K N G G E T S E P V Q F T Y Q P Q L F  
1210 1220 1230 1240 1250 1260  
**NvNFkB\_C67** GACAAGGAGGCGATTGGTGGCAAACGCCGCAAGACAGTGCCACACTTTACCGACTTTCTT  
**NvNFkB\_S67** GACAAGGAGGCGATTGGTGGCAAACGCCGCAAGACAGTGCCACACTTTACCGAATTTCTT  
D K E A I G A K R R K T V P H F T D/E F L  
1270 1280 1290 1300 1310 1320  
**NvNFkB\_C67** TCCGGCGGCTCATCTGGAGCTACAGGTGGAGGGGGAAGTTTCAGTGTCCGGATTCAACTTC  
**NvNFkB\_S67** TCCGGCGGCTCATCTGGAGCTACAGGTGGAGGGGGAAGTTTCAGTGTCCGGATTCAACTTC  
S G G S S G A T G G G G S S V S G F N F  
1330 1340 1350 1360 1370  
**NvNFkB\_C67** CCAGCTGATTTTCTTCAGCAGGGGGTGTTCCTCACCCAAAACCTTCAAACATGTGA  
**NvNFkB\_S67** TCAGCTGATTTTCTTCAGCAGGGGGTGTTCCTCACCCAAAACCTTCAAACATGTGA  
P/S A D F L Q Q G V F S/L T Q N P S N M \*
