# Supplementary material for: Two Alleles of NF-κB in the Sea Anemone Nematostella vectensis Are Widely Dispersed in Nature and Encode Proteins with Distinct Activities
Source: PubMed Central journal article supplement (PMC2751831; doi:10.1371/journal.pone.0007311), 2009-10-06
Supplement: pone.0007311.s003.pdf [file pone.0007311.s003.pdf]

### Supplemental Figure 3 Alignment of *Nematostella* and *Acropora* NF- $\kappa$ B proteins

```

NvNFkB_C  MAQ-SEQQVGSALTESMLNEIIQPGYLPDISALHVPLGTNAEEPSYTEPYLEILEQPKPR  59
NvNFkB_S  MAQ-SEQQVGSALTESMLNEIIRPGYLPDISALHVPLGTNAEEPSYTEPYLEILEQPKPR  59
AmNFkB    MATNSEQQVNATLTDSELLMDVLNPGYLPDISALQVPTG-----SYQGPYLEILEQPKQR  54
          **  *****  ** * *  *****  ** *  **  *****  *

NvNFkB_C  GFRFRYPCEGPSHGGLPGQFSTSKSKSYPSVQVNNYQGPCRIVVTLVTKDEPYMLHAHSL  119
NvNFkB_S  GFRFRYPSSEGPSHGGLPGQFSTSKSKSYPSVQVNNYQGPCRIVVTLVTKDEPYMLHAHSL  119
AmNFkB    GFRFRYPCEGPSHGGLPGEYSE-KGKSYPVQLCNYKGPARIIVVSLVTSDENPMPHAHSL  113
          *****  *****  *  *  *****  ** *  *****  ** *  *****

NvNFkB_C  TGKNANEEGVTVQVGPDQHMTASFPNLGIQHVTKKNVVKVLMDFRIKWQTLQNAATFAKL  179
NvNFkB_S  TGKNANEEGVTVQVGPDQHMTASFPNLGIQHVTKKNVVKVLMDFRIKWQTLQNAATFAKL  179
AmNFkB    IGKNASN-GVTVQIGPEQGMASFPNLGIQHVTKKNVGLVLMDFRYLKMQLHTATLNAL  172
          ****  *****  ** *  *****  *****  *  *  *  *

NvNFkB_C  SEGIKDGVDLSLFGVNTAINSNKLGFDKSVALSVANEEVAKSREYAEQQAAAMDLSAVRL  239
NvNFkB_S  SEGIKDGVDLSLFGVNTAINSNKLGFDKNVALSVANQEAAKSREYAKQQAAAMDLSAVRL  239
AmNFkB    TIDPR-VFDIGAMVDEATADGDRGEFDKQIADTIAEEEASKVRSLVEKQKNSMNLSVVRL  231
          *  ***  *  *  *  *  *  *  *  *  *  *  *  *

NvNFkB_C  CFQAYLPDQDGNFTRPLKPVYSDAVLDSKAPSASQLKICRMDKNSGCVTGGDEIYLLCDK  299
NvNFkB_S  CFQAYLPDQDGNFTRPLKPVYSDAVLDSKEPSASQLKICRMDKNSGCVTGGDEIYLLCDK  299
AmNFkB    CFQAYLPDDNGCFTKALPPCFSRSVYDSKAPSAANLKICRMDRNSGCVTGNDEVYLLCDK  291
          *****  *  **  *  *  *  *  *  *  *  *  *  *  *  *  *  *

NvNFkB_C  VQKDDIEIHFYEMDDITGKYTWEDLGKFSPCDVHRQFAIVFKTPPYWNIAIERPANVLVE  359
NvNFkB_S  VQKDDIEIHFYEMDDITGKYTWEDLGKFSPCDVHRQFAIVFKTPPYWNIAIERPANVLVE  359
AmNFkB    VQKDDIAVVFYEIDEN-GKRSWEGQLLRP????????????????????????????????  320
          *****  ***  *  **  *  *  *

NvNFkB_C  LRRKKNNGGETSEPVQFTYQPQLFDKEAIGAKRRKTVPHFTDFLSGGSSGATGGGGSSVSG  419
NvNFkB_S  LRRKKNNGGETSEPVQFTYQPQLFDKEAIGAKRRKTVPHFTEFLSGGSSGATGGGGSSVSG  419
AmNFkB    ?????????????????????????????????????????????????????????????

NvNFkB_C  FNFPADFLQQGVFSTQNPSNM  440
NvNFkB_S  FNFSADFLQQGVFLTQNPSNM  440
AmNFkB    ?????????????????????????????????????

```
