# Supplementary material for: Two Alleles of NF-κB in the Sea Anemone Nematostella vectensis Are Widely Dispersed in Nature and Encode Proteins with Distinct Activities
Source: PubMed Central journal article supplement (PMC2751831; doi:10.1371/journal.pone.0007311), 2009-10-06
Supplement: pone.0007311.s005.pdf [file pone.0007311.s005.pdf]

**Supplemental Figure 5.** List of 403 individual animals sequenced in the population genetic study.

| Collection Site     | Individual | Allele 1<br>SNPs | Allele 2<br>SNPs | Prob. | Allele<br>1 | Allele 2  | Genotype |
|---------------------|------------|------------------|------------------|-------|-------------|-----------|----------|
| <b>Chezzetcook</b>  | NS88-02CS  | GGAGGTG          | GTTTAAG          | 1.000 | <b>C4</b>   | <b>S1</b> | C4S1     |
| <b>NOVA SCOTIA</b>  | NS88-03CC  | GGAGGTC          | GGAGGTC          | 1.000 | <b>C1</b>   | <b>C1</b> | C1C1     |
| [n=26]              | NS88-04CS  | GGAGGTC          | GTTTAAG          | 1.000 | <b>C1</b>   | <b>S1</b> | C1S1     |
|                     | NS296-03SS | GTTTAAG          | GTTTAAG          | 1.000 | <b>S1</b>   | <b>S1</b> | S1S1     |
|                     | NS296-07CS | GGAGGTC          | GTTTAAG          | 1.000 | <b>C1</b>   | <b>S1</b> | C1S1     |
|                     | NS296-08CS | GGAGGTC          | GTTTAAG          | 1.000 | <b>C1</b>   | <b>S1</b> | C1S1     |
|                     | NS296-09CS | GGAGGTG          | GTTTAAG          | 1.000 | <b>C4</b>   | <b>S1</b> | C4S1     |
|                     | NS296-11CS | GGAGGTG          | GTTTAAG          | 1.000 | <b>C4</b>   | <b>S1</b> | C4S1     |
|                     | NS296-12CS | GGAGGTC          | GTTTAAG          | 1.000 | <b>C1</b>   | <b>S1</b> | C1S1     |
|                     | Hal1-4CS   | GGAGGTC          | GTTTAAG          | 1.000 | <b>C1</b>   | <b>S1</b> | C1S1     |
|                     | Hal1-5CS   | GGAGGTC          | GTTTAAG          | 1.000 | <b>C1</b>   | <b>S1</b> | C1S1     |
|                     | Hal1-6CS   | GGAGGTC          | GTTTAAG          | 1.000 | <b>C1</b>   | <b>S1</b> | C1S1     |
|                     | Hal1-7CS   | GGAGGTC          | GTTTAAG          | 1.000 | <b>C1</b>   | <b>S1</b> | C1S1     |
|                     | Hal1-8CS   | GGAGGTC          | GTTTAAG          | 1.000 | <b>C1</b>   | <b>S1</b> | C1S1     |
|                     | Hal1-9SS   | GTTTAAG          | GTTTAAG          | 1.000 | <b>S1</b>   | <b>S1</b> | S1S1     |
|                     | Hal1-10CS  | GGAGGTC          | GTTTAAG          | 1.000 | <b>C1</b>   | <b>S1</b> | C1S1     |
|                     | Hal1-11CS  | GGAGGTC          | GTTTAAG          | 1.000 | <b>C1</b>   | <b>S1</b> | C1S1     |
|                     | Hal1-12CS  | GGAGGTC          | GTTTAAG          | 1.000 | <b>C1</b>   | <b>S1</b> | C1S1     |
|                     | Hal1-14CS  | GGAGGTC          | GTTTAAG          | 1.000 | <b>C1</b>   | <b>S1</b> | C1S1     |
|                     | Hal1-15CS  | GGAGGTC          | GTTTAAG          | 1.000 | <b>C1</b>   | <b>S1</b> | C1S1     |
|                     | Hal1-16CS  | GGAGGTC          | GTTTAAG          | 1.000 | <b>C1</b>   | <b>S1</b> | C1S1     |
|                     | Hal1-17CS  | GGAGGTC          | GTTTAAG          | 1.000 | <b>C1</b>   | <b>S1</b> | C1S1     |
|                     | Hal1-19CS  | GGAGGTC          | GTTTAAG          | 1.000 | <b>C1</b>   | <b>S1</b> | C1S1     |
|                     | Hal1-20CS  | GGAGGTC          | GTTTAAG          | 1.000 | <b>C1</b>   | <b>S1</b> | C1S1     |
|                     | Hal1-21SS  | GTTTAAG          | GTTTAAG          | 1.000 | <b>S1</b>   | <b>S1</b> | S1S1     |
|                     | Hal1-23CS  | GGAGGTC          | GTTTAAG          | 1.000 | <b>C1</b>   | <b>S1</b> | C1S1     |
| <b>Peggy's Cove</b> | NS299-1SS  | GTTTAAG          | GTTTAAG          | 1.000 | <b>S1</b>   | <b>S1</b> | S1S1     |
| <b>NOVA SCOTIA</b>  | NS299-3SS  | GTTTAAG          | GTTTAAG          | 1.000 | <b>S1</b>   | <b>S1</b> | S1S1     |
| [n=9]               | NS299-4CC  | GGAGGTC          | GGAGGTC          | 1.000 | <b>C1</b>   | <b>C1</b> | C1C1     |
|                     | NS299-5SS  | GTTTAAG          | GTTTAAG          | 1.000 | <b>S1</b>   | <b>S1</b> | S1S1     |
|                     | NS299-6SS  | GTTTAAG          | GTTTAAG          | 1.000 | <b>S1</b>   | <b>S1</b> | S1S1     |
|                     | NS299-8SS  | GTTTAAG          | GTTTAAG          | 1.000 | <b>S1</b>   | <b>S1</b> | S1S1     |
|                     | NS299-9SS  | GTTTAAG          | GTTTAAG          | 1.000 | <b>S1</b>   | <b>S1</b> | S1S1     |
|                     | NS299-10SS | GTTTAAG          | GTTTAAG          | 1.000 | <b>S1</b>   | <b>S1</b> | S1S1     |
|                     | NS299-11SS | GTTTAAG          | GTTTAAG          | 1.000 | <b>S1</b>   | <b>S1</b> | S1S1     |
| <b>Mahone Bay</b>   | NS293-1CC  | GGAGGTC          | GGAGGTC          | 1.000 | <b>C1</b>   | <b>C1</b> | C1C1     |
| <b>NOVA SCOTIA</b>  | NS293-2CC  | GGAGGTC          | GGAGGTC          | 1.000 | <b>C1</b>   | <b>C1</b> | C1C1     |
| [n=19]              | NS293-3CC  | GGAGGTC          | GGAGGTC          | 1.000 | <b>C1</b>   | <b>C1</b> | C1C1     |
|                     | NS293-4CC  | GGAGGTC          | GGAGGTC          | 1.000 | <b>C1</b>   | <b>C1</b> | C1C1     |
|                     | NS293-5CC  | GGAGGTC          | GGAGGTC          | 1.000 | <b>C1</b>   | <b>C1</b> | C1C1     |
|                     | NS293-6CC  | GGAGGTC          | GGAGGTC          | 1.000 | <b>C1</b>   | <b>C1</b> | C1C1     |
|                     | NS293-7CC  | GGAGGTC          | GGAGGTC          | 1.000 | <b>C1</b>   | <b>C1</b> | C1C1     |
|                     | NS293-8CC  | GGAGGTC          | GGAGGTC          | 1.000 | <b>C1</b>   | <b>C1</b> | C1C1     |
|                     | NS293-9CC  | GGAGGTC          | GGAGGTC          | 1.000 | <b>C1</b>   | <b>C1</b> | C1C1     |
|                     | NS293-10CC | GGAGGTC          | GGAGGTC          | 1.000 | <b>C1</b>   | <b>C1</b> | C1C1     |
|                     | NS293-11CC | GGAGGTC          | GGAGGTC          | 1.000 | <b>C1</b>   | <b>C1</b> | C1C1     |

**Supplemental Figure 5.** List of 403 individual animals sequenced in the population genetic study.

| Collection Site    | Individual | Allele 1<br>SNPs | Allele 2<br>SNPs | Prob. | Allele<br>1 | Allele 2  | Genotype |
|--------------------|------------|------------------|------------------|-------|-------------|-----------|----------|
|                    | NS294-1CC  | GGAGGTC          | GGAGGTC          | 1.000 | <b>C1</b>   | <b>C1</b> | C1C1     |
|                    | NS294-2CC  | GGAGGTC          | GGAGGTC          | 1.000 | <b>C1</b>   | <b>C1</b> | C1C1     |
|                    | NS294-4CC  | GGAGGTC          | GGAGGTG          | 1.000 | <b>C1</b>   | <b>C4</b> | C1C4     |
|                    | NS294-5CC  | GGAGGTC          | GGAGGTC          | 1.000 | <b>C1</b>   | <b>C1</b> | C1C1     |
|                    | NS294-6CC  | GGAGGTC          | GGAGGTC          | 1.000 | <b>C1</b>   | <b>C1</b> | C1C1     |
|                    | NS294-7CC  | GGAGGTC          | GGAGGTC          | 1.000 | <b>C1</b>   | <b>C1</b> | C1C1     |
|                    | NS294-9CC  | GGAGGTC          | GGAGGTC          | 1.000 | <b>C1</b>   | <b>C1</b> | C1C1     |
|                    | NS294-10CC | GGAGGTC          | GGAGGTC          | 1.000 | <b>C1</b>   | <b>C1</b> | C1C1     |
| <b>Crescent</b>    | NS291-3CS  | GGAGGTG          | GTTTAAG          | 1.000 | <b>C4</b>   | <b>S1</b> | C4S1     |
| <b>Beach</b>       | NS291-4CC  | GGAGGTC          | GGAGGTC          | 1.000 | <b>C1</b>   | <b>C1</b> | C1C1     |
| <b>NOVA SCOTIA</b> | NS291-5CS  | GGAGGTC          | GTTTAAG          | 1.000 | <b>C1</b>   | <b>S1</b> | C1S1     |
| [n=16]             | NS291-6CS  | GGAGGTC          | GTTTAAG          | 1.000 | <b>C1</b>   | <b>S1</b> | C1S1     |
|                    | NS291-7CS  | GGAGGTC          | GTTTAAG          | 1.000 | <b>C1</b>   | <b>S1</b> | C1S1     |
|                    | NS291-8CS  | GGAGGTC          | GTTTAAG          | 1.000 | <b>C1</b>   | <b>S1</b> | C1S1     |
|                    | NS291-10CS | GGAGGTC          | GTTTAAG          | 1.000 | <b>C1</b>   | <b>S1</b> | C1S1     |
|                    | NS291-11CS | GGAGGTC          | GTTTAAG          | 1.000 | <b>C1</b>   | <b>S1</b> | C1S1     |
|                    | NS291-12CS | GGAGGTC          | GTTTAAG          | 1.000 | <b>C1</b>   | <b>S1</b> | C1S1     |
|                    | NS291-13CS | GGAGGTC          | GTTTAAG          | 1.000 | <b>C1</b>   | <b>S1</b> | C1S1     |
|                    | NS291-15CS | GGAGGTC          | GTTTAAG          | 1.000 | <b>C1</b>   | <b>S1</b> | C1S1     |
|                    | NS291-17CS | GGAGGTC          | GTTTAAG          | 1.000 | <b>C1</b>   | <b>S1</b> | C1S1     |
|                    | NS291-18CS | GGAGGTC          | GTTTAAG          | 1.000 | <b>C1</b>   | <b>S1</b> | C1S1     |
|                    | NS291-19CC | GGAGGTC          | GGAGGTC          | 1.000 | <b>C1</b>   | <b>C1</b> | C1C1     |
|                    | NS291-20CS | GGAGGTC          | GTTTAAG          | 1.000 | <b>C1</b>   | <b>S1</b> | C1S1     |
|                    | NS291-21CS | GGAGGTC          | GTTTAAG          | 1.000 | <b>C1</b>   | <b>S1</b> | C1S1     |
| <b>Noel</b>        | NS298-1CC  | GGAGGTC          | GGAGGTC          | 1.000 | <b>C1</b>   | <b>C1</b> | C1C1     |
| <b>NOVA SCOTIA</b> | NS298-2CC  | GGAGGTC          | GGAGGTC          | 1.000 | <b>C1</b>   | <b>C1</b> | C1C1     |
| [n=10]             | NS298-3CC  | GGAGGTC          | GGAGGTC          | 1.000 | <b>C1</b>   | <b>C1</b> | C1C1     |
|                    | NS298-4SS  | GTTTAAG          | GTTTAAG          | 1.000 | <b>S1</b>   | <b>S1</b> | S1S1     |
|                    | NS298-5CC  | GGAGGTC          | GGAGGTC          | 1.000 | <b>C1</b>   | <b>C1</b> | C1C1     |
|                    | NS298-6CC  | GGAGGTC          | GGAGGTC          | 1.000 | <b>C1</b>   | <b>C1</b> | C1C1     |
|                    | NS298-7CC  | GGAGGTC          | GGAGGTC          | 1.000 | <b>C1</b>   | <b>C1</b> | C1C1     |
|                    | NS298-8CC  | GGAGGTC          | GGAGGTC          | 1.000 | <b>C1</b>   | <b>C1</b> | C1C1     |
|                    | NS298-9CC  | GGAGGTC          | GGAGGTC          | 1.000 | <b>C1</b>   | <b>C1</b> | C1C1     |
|                    | NS298-10CC | GGAGGTC          | GGAGGTC          | 1.000 | <b>C1</b>   | <b>C1</b> | C1C1     |
| <b>Kingsport</b>   | KNG1-1CC   | GGAGGTC          | GGAGGTC          | 1.000 | <b>C1</b>   | <b>C1</b> | C1C1     |
| <b>NOVA SCOTIA</b> | KNG1-2CC   | GGAGGTC          | AGAGGTC          | 1.000 | <b>C1</b>   | <b>C2</b> | C1C2     |
| [n=35]             | KNG1-3CC   | GGAGGTC          | AGAGGTC          | 1.000 | <b>C1</b>   | <b>C2</b> | C1C2     |
|                    | KNG1-4CC   | GGAGGTC          | AGAGGTC          | 1.000 | <b>C1</b>   | <b>C2</b> | C1C2     |
|                    | KNG1-5CC   | GGAGGTC          | GGAGGTC          | 1.000 | <b>C1</b>   | <b>C1</b> | C1C1     |
|                    | KNG1-6CC   | GGAGGTC          | AGAGGTC          | 1.000 | <b>C1</b>   | <b>C2</b> | C1C2     |
|                    | KNG1-7CC   | GGAGGTC          | AGAGGTC          | 1.000 | <b>C1</b>   | <b>C2</b> | C1C2     |
|                    | KNG1-8CC   | GGAGGTC          | AGAGGTC          | 1.000 | <b>C1</b>   | <b>C2</b> | C1C2     |
|                    | KNG1-9CC   | GGAGGTC          | AGAGGTC          | 1.000 | <b>C1</b>   | <b>C2</b> | C1C2     |
|                    | KNG1-11CC  | GGAGGTC          | AGAGGTC          | 1.000 | <b>C1</b>   | <b>C2</b> | C1C2     |
|                    | KNG1-12CC  | GGAGGTC          | AGAGGTC          | 1.000 | <b>C1</b>   | <b>C2</b> | C1C2     |
|                    | KNG1-13CC  | GGAGGTC          | AGAGGTC          | 1.000 | <b>C1</b>   | <b>C2</b> | C1C2     |

**Supplemental Figure 5.** List of 403 individual animals sequenced in the population genetic study.

| Collection Site      | Individual | Allele 1<br>SNPs | Allele 2<br>SNPs | Prob. | Allele 1 | Allele 2 | Genotype |
|----------------------|------------|------------------|------------------|-------|----------|----------|----------|
|                      | KNG2-1CC   | GGAGGTC          | AGAGGTC          | 1.000 | C1       | C2       | C1C2     |
|                      | KNG2-2CC   | GGAGGTC          | GGAGGTC          | 1.000 | C1       | C1       | C1C1     |
|                      | KNG2-5CC   | GGAGGTC          | AGAGGTC          | 1.000 | C1       | C2       | C1C2     |
|                      | KNG2-6CC   | GGAGGTC          | GGAGGTC          | 1.000 | C1       | C1       | C1C1     |
|                      | KNG2-7CC   | GGAGGTC          | GGAGGTC          | 1.000 | C1       | C1       | C1C1     |
|                      | KNG2-8CC   | GGAGGTC          | GGAGGTC          | 1.000 | C1       | C1       | C1C1     |
|                      | KNG2-9CC   | GGAGGTC          | GGAGGTC          | 1.000 | C1       | C1       | C1C1     |
|                      | KNG3-2CC   | GGAGGTC          | GGAGGTC          | 1.000 | C1       | C1       | C1C1     |
|                      | KNG3-3CC   | GGAGGTC          | AGAGGTC          | 1.000 | C1       | C2       | C1C2     |
|                      | KNG3-4CC   | GGAGGTC          | AGAGGTC          | 1.000 | C1       | C2       | C1C2     |
|                      | KNG3-5CC   | GGAGGTC          | GGAGGTC          | 1.000 | C1       | C1       | C1C1     |
|                      | KNG3-6CC   | GGAGGTC          | GGAGGTC          | 1.000 | C1       | C1       | C1C1     |
|                      | KNG3-7CC   | GGAGGTC          | GGAGGTC          | 1.000 | C1       | C1       | C1C1     |
|                      | KNG3-8CC   | GGAGGTC          | GGAGGTC          | 1.000 | C1       | C1       | C1C1     |
|                      | KNG3-9CC   | GGAGGTC          | GGAGGTC          | 1.000 | C1       | C1       | C1C1     |
|                      | KNG3-10CC  | GGAGGTC          | GGAGGTC          | 1.000 | C1       | C1       | C1C1     |
|                      | KNG3-14CC  | GGAGGTC          | GGAGGTG          | 1.000 | C1       | C4       | C1C4     |
|                      | NSC1CC     | GGAGGTC          | GGAGGTC          | 1.000 | C1       | C1       | C1C1     |
|                      | NSC2CC     | GGAGGTC          | GGAGGTC          | 1.000 | C1       | C1       | C1C1     |
|                      | NSC3CC     | GGAGGTC          | GGAGGTC          | 1.000 | C1       | C1       | C1C1     |
|                      | NSC4CC     | GGAGGTC          | GGAGGTC          | 1.000 | C1       | C1       | C1C1     |
|                      | NSC6CC     | GGAGGTC          | GGAGGTC          | 1.000 | C1       | C1       | C1C1     |
|                      | NSC9CC     | GGAGGTC          | GGAGGTC          | 1.000 | C1       | C1       | C1C1     |
| <b>Odiorne Point</b> | OD1CC      | GGAGGTC          | GGAGGTC          | 1.000 | C1       | C1       | C1C1     |
| <b>NEW HAMPSHIRE</b> | OD2CC      | GGAGGTC          | GGAGGTC          | 1.000 | C1       | C1       | C1C1     |
| [n=12]               | OD3CC      | GGAGGTC          | GGAGGTC          | 1.000 | C1       | C1       | C1C1     |
|                      | OD4CC      | GGAGGTC          | GGAGGTC          | 1.000 | C1       | C1       | C1C1     |
|                      | OD5CC      | GGAGGTC          | GGAGGTC          | 1.000 | C1       | C1       | C1C1     |
|                      | OD9CC      | GGAGGTC          | GGAGGTC          | 1.000 | C1       | C1       | C1C1     |
|                      | OD04-3CC   | GGAGGTC          | GGAGGTC          | 1.000 | C1       | C1       | C1C1     |
|                      | OD04-4CC   | GGAGGTC          | GGAGGTC          | 1.000 | C1       | C1       | C1C1     |
|                      | OD04-6CC   | GGAGGTC          | GGAGGTC          | 1.000 | C1       | C1       | C1C1     |
|                      | OD04-7CC   | GGAGGTC          | GGAGGTC          | 1.000 | C1       | C1       | C1C1     |
|                      | OD04-10CC  | GGAGGTC          | GGAGGTC          | 1.000 | C1       | C1       | C1C1     |
|                      | OD04-14CC  | GGAGGTC          | GGAGGTC          | 1.000 | C1       | C1       | C1C1     |
| <b>Rye Harbor</b>    | RH4CC      | GGAGGTC          | GGAGGTC          | 1.000 | C1       | C1       | C1C1     |
| <b>NEW HAMPSHIRE</b> | RH5CC      | GGAGGTC          | GGAGGTC          | 1.000 | C1       | C1       | C1C1     |
| [n=6]                | RH6CC      | GGAGGTC          | GGAGGTC          | 1.000 | C1       | C1       | C1C1     |
|                      | RH7CC      | GGAGGTC          | GGAGGTC          | 1.000 | C1       | C1       | C1C1     |
|                      | RH9CC      | GGAGGTC          | GGAGGTC          | 1.000 | C1       | C1       | C1C1     |
|                      | RH10CC     | GGAGGTC          | GGAGGTC          | 1.000 | C1       | C1       | C1C1     |
| <b>Wallis Sands</b>  | WS1-1-2CC  | GGAGGTC          | GGAGGTC          | 1.000 | C1       | C1       | C1C1     |
| <b>NEW HAMPSHIRE</b> | WS1-1-4CC  | GGAGGTC          | GGAGGTC          | 1.000 | C1       | C1       | C1C1     |
| [n=21]               | WS1-1-5CC  | GGAGGTC          | GGAGGTC          | 1.000 | C1       | C1       | C1C1     |
|                      | WS1-1-6CC  | GGAGGTC          | GGAGGTC          | 1.000 | C1       | C1       | C1C1     |
|                      | WS1-1-9CC  | GGAGGTC          | GGAGGTC          | 1.000 | C1       | C1       | C1C1     |

**Supplemental Figure 5.** List of 403 individual animals sequenced in the population genetic study.

| Collection Site      | Individual | Allele 1<br>SNPs | Allele 2<br>SNPs | Prob. | Allele<br>1 | Allele 2 | Genotype |
|----------------------|------------|------------------|------------------|-------|-------------|----------|----------|
|                      | WS1-1-10CC | GGAGGTC          | GGAGGTC          | 1.000 | C1          | C1       | C1C1     |
|                      | WS1-1-11CC | GGAGGTC          | GGAGGTC          | 1.000 | C1          | C1       | C1C1     |
|                      | WS1-1-12CC | GGAGGTC          | GGAGGTC          | 1.000 | C1          | C1       | C1C1     |
|                      | WS1-1-16CC | GGAGGTC          | GGAGGTC          | 1.000 | C1          | C1       | C1C1     |
|                      | WS1-1-17CC | GGAGGTC          | GGAGGTC          | 1.000 | C1          | C1       | C1C1     |
|                      | WS1-1-18CC | GGAGGTC          | GGAGGTC          | 1.000 | C1          | C1       | C1C1     |
|                      | WS1-1-19CC | GGAGGTC          | GGAGGTC          | 1.000 | C1          | C1       | C1C1     |
|                      | WS1-1-20CC | GGAGGTC          | GGAGGTC          | 1.000 | C1          | C1       | C1C1     |
|                      | WS1-2-2CC  | GGAGGTC          | GGAGGTC          | 1.000 | C1          | C1       | C1C1     |
|                      | WS1-2-3CC  | GGAGGTC          | GGAGGTC          | 1.000 | C1          | C1       | C1C1     |
|                      | WS1-2-4CC  | GGAGGTC          | GGAGGTC          | 1.000 | C1          | C1       | C1C1     |
|                      | WS1-2-5CC  | GGAGGTC          | GGAGGTC          | 1.000 | C1          | C1       | C1C1     |
|                      | WS1-2-7CC  | GGAGGTC          | GGAGGTC          | 1.000 | C1          | C1       | C1C1     |
|                      | WS2-1CC    | GGAGGTC          | GGAGGTC          | 1.000 | C1          | C1       | C1C1     |
|                      | WS2-2CC    | GGAGGTC          | GGAGGTC          | 1.000 | C1          | C1       | C1C1     |
|                      | WS2-3CC    | GGAGGTC          | GGAGGTC          | 1.000 | C1          | C1       | C1C1     |
| <b>Crane</b>         | Cr4CC      | GGAGGTC          | GGAGGTC          | 1.000 | C1          | C1       | C1C1     |
| <b>MASSACHUSETTS</b> | Cr04-0CC   | GGAGGTC          | GGAGGTC          | 1.000 | C1          | C1       | C1C1     |
| [n=12]               | Cr04-1CC   | GGAGGTC          | GGAGGTC          | 1.000 | C1          | C1       | C1C1     |
|                      | Cr04-2CC   | GGAGGTC          | GGAGGTC          | 1.000 | C1          | C1       | C1C1     |
|                      | Cr04-3CC   | GGAGGTC          | GGAGGTC          | 1.000 | C1          | C1       | C1C1     |
|                      | Cr04-4CC   | GGAGGTC          | GGAGGTC          | 1.000 | C1          | C1       | C1C1     |
|                      | Cr04-8CC   | GGAGGTC          | GGAGGTC          | 1.000 | C1          | C1       | C1C1     |
|                      | Cr04-10CC  | GGAGGTC          | GGAGGTC          | 1.000 | C1          | C1       | C1C1     |
|                      | Cr04-11CC  | GGAGGTC          | GGAGGTC          | 1.000 | C1          | C1       | C1C1     |
|                      | Cr04-12CC  | GGAGGTC          | GGAGGTC          | 1.000 | C1          | C1       | C1C1     |
|                      | Cr04-13CC  | GGAGGTC          | GGAGGTC          | 1.000 | C1          | C1       | C1C1     |
|                      | Cr04-14    | GGAGGTC          | GGAGGTC          | 1.000 | C1          | C1       | C1C1     |
| <b>Neponset</b>      | Ne04-3CC   | GGAGGTC          | GGAGGTC          | 1.000 | C1          | C1       | C1C1     |
| <b>MASSACHUSETTS</b> | Ne04-5CC   | GGAGGTC          | GGAGGTC          | 1.000 | C1          | C1       | C1C1     |
| [n=23]               | Ne04-6CC   | GGAGGTC          | GGAGGTC          | 1.000 | C1          | C1       | C1C1     |
|                      | Ne04-8CC   | GGAGGTC          | GGAGGTC          | 1.000 | C1          | C1       | C1C1     |
|                      | Ne04-9CC   | GGAGGTC          | GGAGGTC          | 1.000 | C1          | C1       | C1C1     |
|                      | Ne04-10CC  | GGAGGTC          | GGAGGTC          | 1.000 | C1          | C1       | C1C1     |
|                      | Ne04-11CC  | GGAGGTC          | GGAGGTC          | 1.000 | C1          | C1       | C1C1     |
|                      | Ne04-12CC  | GGAGGTC          | GGAGGTC          | 1.000 | C1          | C1       | C1C1     |
|                      | Ne04-14CC  | GGAGGTC          | GGAGGTC          | 1.000 | C1          | C1       | C1C1     |
|                      | Ne04-16CC  | GGAGGTC          | GGAGGTC          | 1.000 | C1          | C1       | C1C1     |
|                      | Ne04-17CC  | GGAGGTC          | GGAGGTC          | 1.000 | C1          | C1       | C1C1     |
|                      | Ne04-18CC  | GGAGGTC          | GGAGGTC          | 1.000 | C1          | C1       | C1C1     |
|                      | Ne04-19CC  | GGAGGTC          | GGAGGTC          | 1.000 | C1          | C1       | C1C1     |
|                      | Ne04-20CC  | GGAGGTC          | GGAGGTC          | 1.000 | C1          | C1       | C1C1     |
|                      | Ne04-21CC  | GGAGGTC          | GGAGGTC          | 1.000 | C1          | C1       | C1C1     |
|                      | Ne04-22CC  | GGAGGTC          | GGAGGTC          | 1.000 | C1          | C1       | C1C1     |
|                      | Ne04-23CC  | GGAGGTC          | GGAGGTC          | 1.000 | C1          | C1       | C1C1     |
|                      | Ne04-24CC  | GGAGGTC          | GGAGGTC          | 1.000 | C1          | C1       | C1C1     |

**Supplemental Figure 5.** List of 403 individual animals sequenced in the population genetic study.

| Collection Site      | Individual | Allele 1<br>SNPs | Allele 2<br>SNPs | Prob. | Allele<br>1 | Allele 2 | Genotype |
|----------------------|------------|------------------|------------------|-------|-------------|----------|----------|
|                      | Ne04-25CC  | GGAGGTC          | GGAGGTC          | 1.000 | C1          | C1       | C1C1     |
|                      | Ne04-26CC  | GGAGGTC          | GGAGGTC          | 1.000 | C1          | C1       | C1C1     |
|                      | Ne04-27CC  | GGAGGTC          | GGAGGTC          | 1.000 | C1          | C1       | C1C1     |
|                      | Ne04-29CC  | GGAGGTC          | GGAGGTC          | 1.000 | C1          | C1       | C1C1     |
|                      | Ne04-30CC  | GGAGGTC          | GGAGGTC          | 1.000 | C1          | C1       | C1C1     |
| <b>Pocasset</b>      | Po3CC      | GGAGGTC          | GGAGGTC          | 1.000 | C1          | C1       | C1C1     |
| <b>MASSACHUSETTS</b> | Po5CC      | GGAGGTC          | GGAGGTC          | 1.000 | C1          | C1       | C1C1     |
| [n=15]               | Po6CC      | GGAGGTC          | GGAGGTC          | 1.000 | C1          | C1       | C1C1     |
|                      | Po7CC      | GGAGGTC          | GGAGGTC          | 1.000 | C1          | C1       | C1C1     |
|                      | Po8CC      | GGAGGTC          | GGAGGTC          | 1.000 | C1          | C1       | C1C1     |
|                      | Po10CC     | GGAGGTC          | GGAGGTC          | 1.000 | C1          | C1       | C1C1     |
|                      | Po11CC     | GGAGGTC          | GGAGGTC          | 1.000 | C1          | C1       | C1C1     |
|                      | Po12CC     | GGAGGTC          | AGAGGTC          | 1.000 | C1          | C2       | C1C2     |
|                      | Po13CC     | GGAGGTC          | GGAGGTC          | 1.000 | C1          | C1       | C1C1     |
|                      | Po14CC     | GGAGGTC          | GGAGGTC          | 1.000 | C1          | C1       | C1C1     |
|                      | Po15CC     | GGAGGTC          | GGAGGTC          | 1.000 | C1          | C1       | C1C1     |
|                      | Po16CC     | GGAGGTC          | GGAGGTC          | 1.000 | C1          | C1       | C1C1     |
|                      | Po17CC     | GGAGGTC          | GGAGGTC          | 1.000 | C1          | C1       | C1C1     |
|                      | Po21CC     | GGAGGTC          | GGAGGTC          | 1.000 | C1          | C1       | C1C1     |
|                      | Po22CC     | GGAGGTC          | GGAGGTC          | 1.000 | C1          | C1       | C1C1     |
| <b>Sippewisset</b>   | Si1-1CC    | GGAGGTC          | GGAGGTC          | 1.000 | C1          | C1       | C1C1     |
| <b>MASSACHUSETTS</b> | Si1-2CC    | GGAGGTC          | GGAGGTC          | 1.000 | C1          | C1       | C1C1     |
| [n=49]               | Si4-1CC    | GGAGGTC          | GGAGGTC          | 1.000 | C1          | C1       | C1C1     |
|                      | Si4-2-1CC  | GGAGGTC          | GGAGGTC          | 1.000 | C1          | C1       | C1C1     |
|                      | Si4-2-5CC  | GGAGGTC          | GGAGGTC          | 1.000 | C1          | C1       | C1C1     |
|                      | Si4-2-7CC  | GGAGGTC          | GGAGGTC          | 1.000 | C1          | C1       | C1C1     |
|                      | Si4-2-9CC  | GGAGGTC          | GGAGGTC          | 1.000 | C1          | C1       | C1C1     |
|                      | Si4-2-11CC | GGAGGTC          | GGAGGTC          | 1.000 | C1          | C1       | C1C1     |
|                      | Si4-2-14CC | GGAGGTC          | GGAGGTC          | 1.000 | C1          | C1       | C1C1     |
|                      | Si4-2-17CC | GGAGGTC          | GGAGGTC          | 1.000 | C1          | C1       | C1C1     |
|                      | Si4-3-1CC  | GGAGGTC          | GGAGGTC          | 1.000 | C1          | C1       | C1C1     |
|                      | Si4-3-3CC  | GGAGGTC          | GGAGGTC          | 1.000 | C1          | C1       | C1C1     |
|                      | Si4-3-5CC  | GGAGGTC          | GGAGGTC          | 1.000 | C1          | C1       | C1C1     |
|                      | Si4-3-6CC  | GGAGGTC          | GGAGGTC          | 1.000 | C1          | C1       | C1C1     |
|                      | Si13-15CC  | GGAGGTC          | GGAGGTC          | 1.000 | C1          | C1       | C1C1     |
|                      | Si14-1CC   | GGAGGTC          | GGAGGTC          | 1.000 | C1          | C1       | C1C1     |
|                      | Si14-2CC   | GGAGGTC          | GGAGGTC          | 1.000 | C1          | C1       | C1C1     |
|                      | Si14-3CC   | GGAGGTC          | GGAGGTC          | 1.000 | C1          | C1       | C1C1     |
|                      | Si14-4CC   | GGAGGTC          | GGAGGTC          | 1.000 | C1          | C1       | C1C1     |
|                      | Si14-5CC   | GGAGGTC          | GGAGGTC          | 1.000 | C1          | C1       | C1C1     |
|                      | Si14-6CC   | GGAGGTC          | GGAGGTC          | 1.000 | C1          | C1       | C1C1     |
|                      | Si14-7CC   | GGAGGTC          | GGAGGTC          | 1.000 | C1          | C1       | C1C1     |
|                      | Si14-8CC   | GGAGGTC          | GGAGGTC          | 1.000 | C1          | C1       | C1C1     |
|                      | Si14-9CC   | GGAGGTC          | GGAGGTC          | 1.000 | C1          | C1       | C1C1     |
|                      | Si14-10CC  | GGAGGTC          | GGAGGTC          | 1.000 | C1          | C1       | C1C1     |
|                      | Si14-11CC  | GGAGGTC          | GGAGGTC          | 1.000 | C1          | C1       | C1C1     |

**Supplemental Figure 5.** List of 403 individual animals sequenced in the population genetic study.

| Collection Site    | Individual | Allele 1<br>SNPs | Allele 2<br>SNPs | Prob. | Allele<br>1 | Allele 2 | Genotype |
|--------------------|------------|------------------|------------------|-------|-------------|----------|----------|
|                    | Si14-12CC  | GGAGGTC          | GGAGGTC          | 1.000 | C1          | C1       | C1C1     |
|                    | Si14-13CC  | GGAGGTC          | GGAGGTC          | 1.000 | C1          | C1       | C1C1     |
|                    | Si14-14CC  | GGAGGTC          | GGAGGTC          | 1.000 | C1          | C1       | C1C1     |
|                    | Si14-15CC  | GGAGGTC          | GGAGGTC          | 1.000 | C1          | C1       | C1C1     |
|                    | Si15-1CC   | GGAGGTC          | GGAGGTC          | 1.000 | C1          | C1       | C1C1     |
|                    | Si15-2CC   | GGAGGTC          | GGAGGTC          | 1.000 | C1          | C1       | C1C1     |
|                    | Si15-3CC   | GGAGGTC          | GGAGGTC          | 1.000 | C1          | C1       | C1C1     |
|                    | Si15-4CC   | GGAGGTC          | GGAGGTC          | 1.000 | C1          | C1       | C1C1     |
|                    | Si15-5CC   | GGAGGTC          | GGAGGTC          | 1.000 | C1          | C1       | C1C1     |
|                    | Si15-6CC   | GGAGGTC          | GGAGGTC          | 1.000 | C1          | C1       | C1C1     |
|                    | Si15-7CC   | GGAGGTC          | GGAGGTC          | 1.000 | C1          | C1       | C1C1     |
|                    | Si15-8CC   | GGAGGTC          | GGAGGTC          | 1.000 | C1          | C1       | C1C1     |
|                    | Si15-9CC   | GGAGGTC          | GGAGGTC          | 1.000 | C1          | C1       | C1C1     |
|                    | Si15-10CC  | GGAGGTC          | GGAGGTC          | 1.000 | C1          | C1       | C1C1     |
|                    | Si15-11CC  | GGAGGTC          | GGAGGTC          | 1.000 | C1          | C1       | C1C1     |
|                    | Si15-12CC  | GGAGGTC          | GGAGGTC          | 1.000 | C1          | C1       | C1C1     |
|                    | Si15-13CC  | GGAGGTC          | GGAGGTC          | 1.000 | C1          | C1       | C1C1     |
|                    | Si15-14CC  | GGAGGTC          | GGAGGTC          | 1.000 | C1          | C1       | C1C1     |
|                    | Si15-15CC  | GGAGGTC          | GGAGGTC          | 1.000 | C1          | C1       | C1C1     |
|                    | Si16-1CS   | GGAGGTC          | GTTTAAG          | 1.000 | C1          | S1       | C1S1     |
|                    | Si16-2CS   | GGAGGTC          | GTTTAAG          | 1.000 | C1          | S1       | C1S1     |
|                    | Si16-3CS   | GGAGGTC          | GTTTAAG          | 1.000 | C1          | S1       | C1S1     |
|                    | Si16-8CS   | GGAGGTC          | GGAGGTC          | 1.000 | C1          | C1       | C1C1     |
| <b>Meadowlands</b> | NJ2CC      | GGAGGTC          | GGAGGTC          | 1.000 | C1          | C1       | C1C1     |
| <b>NEW JERSEY</b>  | NJ3CC      | GGAGGTC          | GGAGGTC          | 1.000 | C1          | C1       | C1C1     |
| [n=8]              | NJ1-4CC    | GGAGGTC          | GGAGGTC          | 1.000 | C1          | C1       | C1C1     |
|                    | NJ1-5CC    | GGAGGTC          | GGAGGTC          | 1.000 | C1          | C1       | C1C1     |
|                    | NJ1-8CC    | GGAGGTC          | GGAGGTC          | 1.000 | C1          | C1       | C1C1     |
|                    | NJ1-9CC    | GGAGGTC          | GGAGGTC          | 1.000 | C1          | C1       | C1C1     |
|                    | NJ1-10CC   | GGAGGTC          | GGAGGTC          | 1.000 | C1          | C1       | C1C1     |
|                    | NJ1-11CC   | GGAGGTC          | GGAGGTC          | 1.000 | C1          | C1       | C1C1     |
| <b>Rhode River</b> | Rh1CS      | GGAGGTC          | GTTTAAG          | 1.000 | C1          | S1       | C1S1     |
| <b>MARYLAND</b>    | Rh3SS      | GTTTAAG          | GTTTAAG          | 1.000 | S1          | S1       | S1S1     |
| [n=61]             | Rh5SS      | GTTTAAG          | GTTTAAG          | 1.000 | S1          | S1       | S1S1     |
|                    | Rh6CS      | GGAGGTC          | GTTTAAG          | 1.000 | C1          | S1       | C1S1     |
|                    | Rh8CS      | GGAGGTC          | GTTTAAG          | 1.000 | C1          | S1       | C1S1     |
|                    | Rh9CC      | GGAGGTC          | GGAGGTC          | 1.000 | C1          | C1       | C1C1     |
|                    | Rh10CC     | GGAGGTC          | GGAGGTC          | 1.000 | C1          | C1       | C1C1     |
|                    | Rh11CS     | GGAGGTC          | GTTTAAG          | 1.000 | C1          | S1       | C1S1     |
|                    | Rh12CS     | GGAGGTC          | GTTTAAG          | 1.000 | C1          | S1       | C1S1     |
|                    | Rh13CC     | GGAGGTC          | GGAGGTC          | 1.000 | C1          | C1       | C1C1     |
|                    | Rh14SS     | GTTTAAG          | GTTTAAG          | 1.000 | S1          | S1       | S1S1     |
|                    | Rh15SS     | GTTTAAG          | GTTTAAG          | 1.000 | S1          | S1       | S1S1     |
|                    | Rh16CC     | GGAGGTC          | GGAGGTC          | 1.000 | C1          | C1       | C1C1     |
|                    | Rh17CS     | GGAGGTC          | GTTTAAG          | 1.000 | C1          | S1       | C1S1     |
|                    | Rh18CS     | GGAGGTC          | GTTTAAG          | 1.000 | C1          | S1       | C1S1     |

**Supplemental Figure 5.** List of 403 individual animals sequenced in the population genetic study.

| Collection Site | Individual | Allele 1<br>SNPs | Allele 2<br>SNPs | Prob. | Allele 1 | Allele 2 | Genotype |
|-----------------|------------|------------------|------------------|-------|----------|----------|----------|
|                 | Rh19CC     | GGAGGTC          | GGAGGTC          | 1.000 | C1       | C1       | C1C1     |
|                 | Rh21CC     | GGAGGTC          | GGAGGTC          | 1.000 | C1       | C1       | C1C1     |
|                 | Rh23CS     | GGAGGTC          | GTTTAAG          | 1.000 | C1       | S1       | C1S1     |
|                 | Rh24CS     | GGAGGTC          | GTTTAAG          | 1.000 | C1       | S1       | C1S1     |
|                 | Rh1-1SS    | GTTTAAG          | GTTTAAG          | 1.000 | S1       | S1       | S1S1     |
|                 | Rh1-2CS    | GGAGGTC          | GTTTAAG          | 1.000 | C1       | S1       | C1S1     |
|                 | Rh1-3CC    | GGAGGTC          | GGAGGTC          | 1.000 | C1       | C1       | C1C1     |
|                 | Rh1-6CC    | GGAGGTC          | GGAGGTC          | 1.000 | C1       | C1       | C1C1     |
|                 | Rh1-7CC    | GGAGGTC          | GGAGGTC          | 1.000 | C1       | C1       | C1C1     |
|                 | Rh1-8CS    | GGAGGTC          | GTTTAAG          | 1.000 | C1       | S1       | C1S1     |
|                 | Rh1-9SS    | GTTTAAG          | GTTTAAG          | 1.000 | S1       | S1       | S1S1     |
|                 | Rh1-10CC   | GGAGGTC          | GGAGGTC          | 1.000 | C1       | C1       | C1C1     |
|                 | Rh1-11CS   | GGAGGTC          | GTTTAAG          | 1.000 | C1       | S1       | C1S1     |
|                 | Rh1-13CS   | GGAGGTC          | GTTTAAG          | 1.000 | C1       | S1       | C1S1     |
|                 | Rh1-14CS   | GGAGGTC          | GTTTAAG          | 1.000 | C1       | S1       | C1S1     |
|                 | Rh1-15CS   | GGAGGTC          | GTTTAAG          | 1.000 | C1       | S1       | C1S1     |
|                 | Rh1-17CS   | GGAGGTC          | GTTTAAG          | 1.000 | C1       | S1       | C1S1     |
|                 | Rh1-18CC   | GGAGGTC          | GGAGGTC          | 1.000 | C1       | C1       | C1C1     |
|                 | Rh1-19SS   | GTTTAAG          | GTTTAAG          | 1.000 | S1       | S1       | S1S1     |
|                 | Rh1-20CC   | GGAGGTC          | GGAGGTC          | 1.000 | C1       | C1       | C1C1     |
|                 | Rh1-21CS   | GGAGGTC          | GTTTAAG          | 1.000 | C1       | S1       | C1S1     |
|                 | Rh1-23CC   | GGAGGTC          | GGAGGTC          | 1.000 | C1       | C1       | C1C1     |
|                 | Rh1-24CC   | GGAGGTC          | GGAGGTC          | 1.000 | C1       | C1       | C1C1     |
|                 | Rh1-27CC   | GGAGGTC          | GGAGGTC          | 1.000 | C1       | C1       | C1C1     |
|                 | Rh1-28SS   | GTTTAAG          | GTTTAAG          | 1.000 | S1       | S1       | S1S1     |
|                 | Rh1-30CC   | GGAGGTC          | GGAGGTC          | 1.000 | C1       | C1       | C1C1     |
|                 | Rh1-31CS   | GGAGGTC          | GTTTAAG          | 1.000 | C1       | S1       | C1S1     |
|                 | Rh1-32CC   | GGAGGTC          | GGAGGTC          | 1.000 | C1       | C1       | C1C1     |
|                 | Rh1-33CC   | GGAGGTC          | GGAGGTC          | 1.000 | C1       | C1       | C1C1     |
|                 | Rh1-34CC   | GGAGGTC          | GGAGGTC          | 1.000 | C1       | C1       | C1C1     |
|                 | Rh1-35CS   | GGAGGTC          | GTTTAAG          | 1.000 | C1       | S1       | C1S1     |
|                 | Rh1-36CS   | GGAGGTC          | GTTTAAG          | 1.000 | C1       | S1       | C1S1     |
|                 | Rh1-37CS   | GGAGGTC          | GTTTAAG          | 1.000 | C1       | S1       | C1S1     |
|                 | Rh1-38CS   | GGAGGTC          | GTTTAAG          | 1.000 | C1       | S1       | C1S1     |
|                 | Rh1-39SS   | GTTTAAG          | GTTTAAG          | 1.000 | S1       | S1       | S1S1     |
|                 | Rh1-40CC   | GGAGGTC          | GGAGGTC          | 1.000 | C1       | C1       | C1C1     |
|                 | Rh1-41CC   | GGAGGTC          | GGAGGTC          | 1.000 | C1       | C1       | C1C1     |
|                 | Rh1-43SS   | GTTTAAG          | GTTTAAG          | 1.000 | S1       | S1       | S1S1     |
|                 | Rh1-44CC   | GGAGGTC          | GGAGGTC          | 1.000 | C1       | C1       | C1C1     |
|                 | Rh1-47CS   | GGAGGTC          | GTTTAAG          | 1.000 | C1       | S1       | C1S1     |
|                 | Rh1-49CS   | GGAGGTC          | GTTTAAG          | 1.000 | C1       | S1       | C1S1     |
|                 | Rh1-52CS   | GGAGGTC          | GTTTAAG          | 1.000 | C1       | S1       | C1S1     |
|                 | Rh1-53CS   | GGAGGTC          | GTTTAAG          | 1.000 | C1       | S1       | C1S1     |
|                 | Rh1-54CC   | GGAGGTC          | GGAGGTC          | 1.000 | C1       | C1       | C1C1     |
|                 | Rh1-58CS   | GGAGGTC          | GTTTAAG          | 1.000 | C1       | S1       | C1S1     |
|                 | Rh1-60SS   | GTTTAAG          | GTTTAAG          | 1.000 | S1       | S1       | S1S1     |

**Supplemental Figure 5.** List of 403 individual animals sequenced in the population genetic study.

| Collection Site      | Individual | Allele 1<br>SNPs | Allele 2<br>SNPs | Prob. | Allele 1  | Allele 2  | Genotype |
|----------------------|------------|------------------|------------------|-------|-----------|-----------|----------|
| <b>Baruch</b>        | Ba1a3CC    | GGAGGTC          | AGAGGTG          | 0.970 | <b>C1</b> | <b>C3</b> | C1C3     |
| <b>SOUTH</b>         | Ba1a4CC    | AGAGGTG          | AGAGGTG          | 1.000 | <b>C3</b> | <b>C3</b> | C3C3     |
| <b>CAROLINA</b>      | Ba1a5CC    | GGAGGTC          | AGAGGTG          | 0.969 | <b>C1</b> | <b>C3</b> | C1C3     |
| [n=23]               | Ba1a6CC    | GGAGGTC          | GGAGGTC          | 1.000 | <b>C1</b> | <b>C1</b> | C1C1     |
|                      | Ba1a8CC    | AGAGGTG          | AGAGGTG          | 1.000 | <b>C3</b> | <b>C3</b> | C3C3     |
|                      | Ba1a9CC    | GGAGGTC          | AGAGGTG          | 0.969 | <b>C1</b> | <b>C3</b> | C1C3     |
|                      | Ba1a10CC   | GGAGGTC          | GGAGGTC          | 1.000 | <b>C1</b> | <b>C1</b> | C1C1     |
|                      | Ba1a11CC   | GGAGGTC          | AGAGGTG          | 0.969 | <b>C1</b> | <b>C3</b> | C1C3     |
|                      | Ba1a13CC   | GGAGGTC          | AGAGGTG          | 0.969 | <b>C1</b> | <b>C3</b> | C1C3     |
|                      | Ba1a14CC   | GGAGGTC          | GGAGGTC          | 1.000 | <b>C1</b> | <b>C1</b> | C1C1     |
|                      | Ba1a15CC   | GGAGGTC          | AGAGGTG          | 0.969 | <b>C1</b> | <b>C3</b> | C1C3     |
|                      | Ba1a16CC   | GGAGGTC          | AGAGGTG          | 0.970 | <b>C1</b> | <b>C3</b> | C1C3     |
|                      | Ba1a17CC   | GGAGGTC          | GGAGGTC          | 1.000 | <b>C1</b> | <b>C1</b> | C1C1     |
|                      | Ba1a18CC   | GGAGGTC          | AGAGGTG          | 0.969 | <b>C1</b> | <b>C3</b> | C1C3     |
|                      | Ba1a19CC   | GGAGGTC          | AGAGGTG          | 0.969 | <b>C1</b> | <b>C3</b> | C1C3     |
|                      | Ba1c1CC    | GGAGGTC          | AGAGGTG          | 0.970 | <b>C1</b> | <b>C3</b> | C1C3     |
|                      | Ba1c2CC    | GGAGGTC          | AGAGGTG          | 0.969 | <b>C1</b> | <b>C3</b> | C1C3     |
|                      | Ba2-2CC    | GGAGGTC          | GGAGGTC          | 1.000 | <b>C1</b> | <b>C1</b> | C1C1     |
|                      | Ba2a4CC    | GGAGGTC          | GGAGGTC          | 1.000 | <b>C1</b> | <b>C1</b> | C1C1     |
|                      | Ba2a5CC    | GGAGGTC          | AGAGGTG          | 0.969 | <b>C1</b> | <b>C3</b> | C1C3     |
|                      | Ba2b1CC    | GGAGGTC          | GGAGGTC          | 1.000 | <b>C1</b> | <b>C1</b> | C1C1     |
|                      | Ba2b2CC    | GGAGGTC          | AGAGGTG          | 0.969 | <b>C1</b> | <b>C3</b> | C1C3     |
|                      | Ba2c6CC    | GGAGGTC          | AGAGGTG          | 0.970 | <b>C1</b> | <b>C3</b> | C1C3     |
| <b>San Juan</b>      | SJ1-4CC    | GGAGGTC          | GGAGGTC          | 1.000 | <b>C1</b> | <b>C1</b> | C1C1     |
| <b>WASHINGTON</b>    | SJ1-6CC    | GGAGGTC          | GGAGGTC          | 1.000 | <b>C1</b> | <b>C1</b> | C1C1     |
| [n=12]               | SJ1-7CC    | GGAGGTC          | GGAGGTC          | 1.000 | <b>C1</b> | <b>C1</b> | C1C1     |
|                      | SJ2-4CC    | GGAGGTC          | GGAGGTC          | 1.000 | <b>C1</b> | <b>C1</b> | C1C1     |
|                      | SJ2-5CC    | GGAGGTC          | GGAGGTC          | 1.000 | <b>C1</b> | <b>C1</b> | C1C1     |
|                      | SJ2-6CC    | GGAGGTC          | GGAGGTC          | 1.000 | <b>C1</b> | <b>C1</b> | C1C1     |
|                      | SJ2-7CC    | GGAGGTC          | GGAGGTC          | 1.000 | <b>C1</b> | <b>C1</b> | C1C1     |
|                      | SJ3-4CC    | GGAGGTC          | GGAGGTC          | 1.000 | <b>C1</b> | <b>C1</b> | C1C1     |
|                      | SJ3-5CC    | GGAGGTC          | GGAGGTC          | 1.000 | <b>C1</b> | <b>C1</b> | C1C1     |
|                      | SJ3-6CC    | GGAGGTC          | GGAGGTC          | 1.000 | <b>C1</b> | <b>C1</b> | C1C1     |
|                      | SJ3-8CC    | GGAGGTC          | GGAGGTC          | 1.000 | <b>C1</b> | <b>C1</b> | C1C1     |
|                      | SJ25-3CC   | GGAGGTC          | GGAGGTC          | 1.000 | <b>C1</b> | <b>C1</b> | C1C1     |
| <b>Coos Bay, OR</b>  | Co3CC      | GGAGGTC          | GGAGGTC          | 1.000 | <b>C1</b> | <b>C1</b> | C1C1     |
| <b>San Francisco</b> | CABC1CC    | GGAGGTC          | GGAGGTC          | 1.000 | <b>C1</b> | <b>C1</b> | C1C1     |
| <b>CALIFORNIA</b>    | CABC2CS    | GGAGGTC          | GTTTAAG          | 1.000 | <b>C1</b> | <b>S1</b> | C1S1     |
| [n=5]                | CABC3CC    | GGAGGTC          | GGAGGTC          | 1.000 | <b>C1</b> | <b>C1</b> | C1C1     |
|                      | CABC4CC    | GGAGGTC          | GGAGGTC          | 1.000 | <b>C1</b> | <b>C1</b> | C1C1     |
|                      | CABC5CS    | GGAGGTC          | GTTTAAG          | 1.000 | <b>C1</b> | <b>S1</b> | C1S1     |
| <b>Humboldt Bay</b>  | CASM1CS    | GGAGGTC          | GTTTAAG          | 1.000 | <b>C1</b> | <b>S1</b> | C1S1     |
| <b>CALIFORNIA</b>    | CASM3CS    | GGAGGTC          | GTTTAAG          | 1.000 | <b>C1</b> | <b>S1</b> | C1S1     |
| [n=8]                | CASM9CC    | GGAGGTC          | GGAGGTC          | 1.000 | <b>C1</b> | <b>C1</b> | C1C1     |
|                      | CASM11CC   | GGAGGTC          | GGAGGTC          | 1.000 | <b>C1</b> | <b>C1</b> | C1C1     |
|                      | CASM13CS   | GGAGGTC          | GTTTAAG          | 1.000 | <b>C1</b> | <b>S1</b> | C1S1     |



**Supplemental Figure 5.** List of 403 individual animals sequenced in the population genetic study.

| Collection Site      | Individual    | Allele 1<br>SNPs | Allele 2<br>SNPs | Prob.       | Allele<br>1 | Allele 2   | Genotype    |
|----------------------|---------------|------------------|------------------|-------------|-------------|------------|-------------|
|                      | CB5CC         | GGAGGTC          | GGAGGTC          | 1.000       | <b>C1</b>   | <b>C1</b>  | C1C1        |
|                      | CC2-6CC       | GGAGGTC          | GGAGGTC          | 1.000       | <b>C1</b>   | <b>C1</b>  | C1C1        |
|                      | CD2CC         | GGAGGTC          | GGAGGTC          | 1.000       | <b>C1</b>   | <b>C1</b>  | C1C1        |
| <b>Gilkicker</b>     | Gi1CC         | GGAGGTC          | AGAGGTC          | 1.000       | <b>C1</b>   | <b>C2</b>  | C1C2        |
| <b>UK</b>            | Gi3CC         | GGAGGTC          | AGAGGTC          | 1.000       | <b>C1</b>   | <b>C2</b>  | C1C2        |
| [n=9]                | Gi4CC         | GGAGGTC          | AGAGGTC          | 1.000       | <b>C1</b>   | <b>C2</b>  | C1C2        |
|                      | Gi5CC         | GGAGGTC          | AGAGGTC          | 1.000       | <b>C1</b>   | <b>C2</b>  | C1C2        |
|                      | Gi6CC         | GGAGGTC          | AGAGGTC          | 1.000       | <b>C1</b>   | <b>C2</b>  | C1C2        |
|                      | Gi7CC         | GGAGGTC          | AGAGGTC          | 1.000       | <b>C1</b>   | <b>C2</b>  | C1C2        |
|                      | Gi8CC         | GGAGGTC          | AGAGGTC          | 1.000       | <b>C1</b>   | <b>C2</b>  | C1C2        |
|                      | Gi10CC        | GGAGGTC          | AGAGGTC          | 1.000       | <b>C1</b>   | <b>C2</b>  | C1C2        |
|                      | Gi11CC        | GGAGGTC          | AGAGGTC          | 1.000       | <b>C1</b>   | <b>C2</b>  | C1C2        |
| <b>Near Salterns</b> | NrS1CC        | GGAGGTC          | AGAGGTC          | 1.000       | <b>C1</b>   | <b>C2</b>  | C1C2        |
| <b>UK</b>            | NrS2CC        | GGAGGTC          | AGAGGTC          | 1.000       | <b>C1</b>   | <b>C2</b>  | C1C2        |
| [n=14]               | NrS3CC        | GGAGGTC          | AGAGGTC          | 1.000       | <b>C1</b>   | <b>C2</b>  | C1C2        |
|                      | NrS4CC        | GGAGGTC          | AGAGGTC          | 1.000       | <b>C1</b>   | <b>C2</b>  | C1C2        |
|                      | NrS5CC        | GGAGGTC          | AGAGGTC          | 1.000       | <b>C1</b>   | <b>C2</b>  | C1C2        |
|                      | NrS6CC        | GGAGGTC          | AGAGGTC          | 1.000       | <b>C1</b>   | <b>C2</b>  | C1C2        |
|                      | NrS7CC        | GGAGGTC          | AGAGGTC          | 1.000       | <b>C1</b>   | <b>C2</b>  | C1C2        |
|                      | NrS8CC        | GGAGGTC          | AGAGGTC          | 1.000       | <b>C1</b>   | <b>C2</b>  | C1C2        |
|                      | NrS9CC        | GGAGGTC          | AGAGGTC          | 1.000       | <b>C1</b>   | <b>C2</b>  | C1C2        |
|                      | NrS10CC       | GGAGGTC          | AGAGGTC          | 1.000       | <b>C1</b>   | <b>C2</b>  | C1C2        |
|                      | NrS11CC       | GGAGGTC          | AGAGGTC          | 1.000       | <b>C1</b>   | <b>C2</b>  | C1C2        |
|                      | NrS13CC       | GGAGGTC          | AGAGGTC          | 1.000       | <b>C1</b>   | <b>C2</b>  | C1C2        |
|                      | NrS14CC       | GGAGGTC          | AGAGGTC          | 1.000       | <b>C1</b>   | <b>C2</b>  | C1C2        |
|                      | NrS15CC       | GGAGGTC          | AGAGGTC          | 1.000       | <b>C1</b>   | <b>C2</b>  | C1C2        |
| <b>Salterns</b>      | Sa1CC         | GGAGGTC          | AGAGGTC          | 1.000       | <b>C1</b>   | <b>C2</b>  | C1C2        |
| <b>UK</b>            | Sa3CC         | GGAGGTC          | AGAGGTC          | 1.000       | <b>C1</b>   | <b>C2</b>  | C1C2        |
| [n=9]                | Sa4CC         | GGAGGTC          | AGAGGTC          | 1.000       | <b>C1</b>   | <b>C2</b>  | C1C2        |
|                      | Sa5CC         | GGAGGTC          | AGAGGTC          | 1.000       | <b>C1</b>   | <b>C2</b>  | C1C2        |
|                      | Sa6CC         | GGAGGTC          | AGAGGTC          | 1.000       | <b>C1</b>   | <b>C2</b>  | C1C2        |
|                      | Sa7CC         | GGAGGTC          | AGAGGTC          | 1.000       | <b>C1</b>   | <b>C2</b>  | C1C2        |
|                      | Sa8CC         | GGAGGTC          | AGAGGTC          | 1.000       | <b>C1</b>   | <b>C2</b>  | C1C2        |
|                      | Sa9CC         | GGAGGTC          | AGAGGTC          | 1.000       | <b>C1</b>   | <b>C2</b>  | C1C2        |
|                      | Sa10CC        | GGAGGTC          | AGAGGTC          | 1.000       | <b>C1</b>   | <b>C2</b>  | C1C2        |
|                      |               |                  |                  |             |             |            |             |
|                      | <b>TOTALS</b> | <b>Allele</b>    | <b>#</b>         | <b>Freq</b> | <b>Geno</b> | <b>#</b>   | <b>Freq</b> |
|                      |               | <b>C1</b>        | 618              | 0.77        | <b>C1C1</b> | 244        | 0.605       |
|                      |               | <b>C2</b>        | 47               | 0.06        | <b>C1C2</b> | 47         | 0.117       |
|                      |               | <b>C3</b>        | 18               | 0.02        | <b>C1C3</b> | 14         | 0.035       |
|                      |               | <b>C4</b>        | 6                | 0.01        | <b>C1C4</b> | 2          | 0.005       |
|                      |               | <b>S1</b>        | 117              | 0.15        | <b>C3C3</b> | 2          | 0.005       |
|                      |               | <b>ALL</b>       | <b>806</b>       |             | <b>C1S1</b> | 67         | 0.166       |
|                      |               |                  |                  |             | <b>C4S1</b> | 4          | 0.010       |
|                      |               | 389              |                  |             | <b>S1S1</b> | 23         | 0.057       |
|                      |               | 0.9652605        |                  |             | <b>ALL</b>  | <b>403</b> |             |
